# Supplementary material for: Fractionated Irradiation of Right Thorax Induces Abscopal Damage on Bone Marrow Cells via TNF-α and SAA
Source: Int J Mol Sci. 2021 Sep 15;22(18):9964. doi: 10.3390/ijms22189964 (PMC8468747; doi:10.3390/ijms22189964)
Supplement: Supplementary file 1 [file ijms-22-09964-s001.zip › Table S1_TMT data analysis.xlsx]

## Sheet: Summary
	Header line description of worksheet "IR VS Sham"
	Project	Description
	Gene name	Indicates the name of the gene that code for the protein sequence
	Description	Target protein name and description
	Coverage	Coverage of the peptides
	MW (kDa)	Molecular weight of the protein
	Fold Change-IR/Sham	Protein abundance in mice serum between irradiation group (IR) and sham irradiation group (Sham-IR)
	Regulated type	Including up-regulated (Fold Change >1) and down-regulated (Fold Change < 1)

## Sheet: IR VS Sham
Table S1 Total differentially expressed proteins between irradiation group (IR) and sham irradiation group (Sham-IR)
Gene name	Description	Coverage	MW [kDa]	IR-7d	Sham-7d	Fold Change-IR/Sham	Log2 (FC)	P-value	Regulated Type
Saa2	Serum amyloid A-2 protein OS=Mus musculus OX=10090 GN=Saa2 PE=1 SV=1	53.2787	13.613	235.5	61.2	3.84804	1.94412	8.85193e-19	up
Saa1	Serum amyloid A-1 protein OS=Mus musculus OX=10090 GN=Saa1 PE=1 SV=2	54.0984	13.762	222.2	69.6	3.19253	1.6747	2.00521e-14	up
Vmn2r1	Vomeronasal type-2 receptor 1 OS=Mus musculus OX=10090 GN=Vmn2r1 PE=1 SV=1	0.767544	102.282	148	58.95	2.5106	1.32803	1.00717e-09	up
Scgb2b24	Secretoglobin family 2B member 24 OS=Mus musculus OX=10090 GN=Scgb2b24 PE=2 SV=1	6.25	12.526	162.7	65.5	2.48397	1.31265	1.54276e-09	up
Scgb2b20	Secretoglobin family 2B member 20 OS=Mus musculus OX=10090 GN=Scgb2b20 PE=2 SV=1	32.1429	12.581	164.8	71.8	2.29526	1.19866	3.15158e-08	up
Pvalb	Parvalbumin alpha OS=Mus musculus OX=10090 GN=Pvalb PE=1 SV=3	71.8182	11.923	150	77.7	1.9305	0.948975	9.77167e-06	up
Ckm	Creatine kinase M-type OS=Mus musculus OX=10090 GN=Ckm PE=1 SV=1	27.8215	43.018	145.8	78.35	1.86088	0.895985	2.83344e-05	up
Sertad4	SERTA domain-containing protein 4 OS=Mus musculus OX=10090 GN=Sertad4 PE=2 SV=1	1.85676	41.07	135.7	74.2	1.82884	0.870929	4.60137e-05	up
Pfkm	ATP-dependent 6-phosphofructokinase, muscle type OS=Mus musculus OX=10090 GN=Pfkm PE=1 SV=3	1.41026	85.215	146.7	81.4	1.80221	0.849767	6.86624e-05	up
Serpina3n	Serine protease inhibitor A3N OS=Mus musculus OX=10090 GN=Serpina3n PE=1 SV=1	48.0861	46.688	148.3	86.85	1.70754	0.771919	0.000278415	up
Scgb2b2	Secretoglobin family 2B member 2 OS=Mus musculus OX=10090 GN=Scgb2b2 PE=2 SV=1	35.0877	12.849	134.8	79	1.70633	0.770897	0.000283379	up
Leg1	Protein LEG1 homolog OS=Mus musculus OX=10090 GN=Leg1 PE=2 SV=2	11.276	38.259	131.6	77.15	1.70577	0.770423	0.000285705	up
Ces2a	Pyrethroid hydrolase Ces2a OS=Mus musculus OX=10090 GN=Ces2a PE=1 SV=1	11.2903	61.9	136.1	84.3	1.61447	0.691061	0.00105689	up
Daam1	Disheveled-associated activator of morphogenesis 1 OS=Mus musculus OX=10090 GN=Daam1 PE=1 SV=4	0.928505	123.293	119.9	74.35	1.61264	0.689424	0.00108444	up
Pgm1	Phosphoglucomutase-1 OS=Mus musculus OX=10090 GN=Pgm1 PE=1 SV=4	3.73665	61.38	125.8	78.1	1.61076	0.687742	0.00111358	up
Ces2e	Pyrethroid hydrolase Ces2e OS=Mus musculus OX=10090 GN=Ces2e PE=1 SV=1	17.5313	62.277	130.3	83.75	1.55582	0.637675	0.00238584	up
Mup4	Major urinary protein 4 OS=Mus musculus OX=10090 GN=Mup4 PE=1 SV=1	58.9888	20.528	137.5	88.6	1.55192	0.634054	0.00251658	up
Atf6b	Cyclic AMP-dependent transcription factor ATF-6 beta OS=Mus musculus OX=10090 GN=Atf6b PE=1 SV=1	1.71674	75.96	131	85.1	1.53937	0.62234	0.00298557	up
Eno3	Beta-enolase OS=Mus musculus OX=10090 GN=Eno3 PE=1 SV=3	35.7143	46.995	127.5	83.2	1.53245	0.61584	0.00327859	up
Crisp1	Cysteine-rich secretory protein 1 OS=Mus musculus OX=10090 GN=Crisp1 PE=2 SV=1	38.1148	27.661	148.9	97.4	1.52875	0.612352	0.00344675	up
Pgam2	Phosphoglycerate mutase 2 OS=Mus musculus OX=10090 GN=Pgam2 PE=1 SV=3	26.4822	28.809	129.9	85.35	1.52197	0.60594	0.00377613	up
Ces2c	Acylcarnitine hydrolase OS=Mus musculus OX=10090 GN=Ces2c PE=1 SV=1	13.7255	62.429	131.5	86.75	1.51585	0.600127	0.0040991	up
Serpina11	Serpin A11 OS=Mus musculus OX=10090 GN=Serpina11 PE=2 SV=1	2.35849	47.159	134.9	89.15	1.51318	0.597584	0.00424819	up
Obp1a	Odorant-binding protein 1a OS=Mus musculus OX=10090 GN=Obp1a PE=1 SV=2	36.8098	18.457	133.6	89.3	1.49608	0.581187	0.00533319	up
Serpina3m	Serine protease inhibitor A3M OS=Mus musculus OX=10090 GN=Serpina3m PE=1 SV=2	46.6507	47.034	124.6	84.95	1.46675	0.552623	0.00783483	up
Gpx5	Epididymal secretory glutathione peroxidase OS=Mus musculus OX=10090 GN=Gpx5 PE=2 SV=3	15.3846	25.376	127.6	88.5	1.44181	0.527881	0.0108013	up
Dnase1	Deoxyribonuclease-1 OS=Mus musculus OX=10090 GN=Dnase1 PE=1 SV=2	5.6338	32.007	114.3	80.2	1.42519	0.511154	0.0133365	up
Igfbp5	Insulin-like growth factor-binding protein 5 OS=Mus musculus OX=10090 GN=Igfbp5 PE=1 SV=1	8.48708	30.352	129.2	91.85	1.40664	0.492253	0.0168209	up
Ces1d	Carboxylesterase 1D OS=Mus musculus OX=10090 GN=Ces1d PE=1 SV=1	8.67257	61.749	118.4	84.75	1.39705	0.482384	0.0189409	up
Apoa4	Apolipoprotein A-IV OS=Mus musculus OX=10090 GN=Apoa4 PE=1 SV=3	74.1772	45.001	122.4	87.85	1.39328	0.478485	0.0198395	up
Apoc1	Apolipoprotein C-I OS=Mus musculus OX=10090 GN=Apoc1 PE=1 SV=1	43.1818	9.69	110.3	79.25	1.3918	0.476952	0.0202048	up
Tagln	Transgelin OS=Mus musculus OX=10090 GN=Tagln PE=1 SV=3	6.46766	22.561	116.9	84.3	1.38671	0.471666	0.0215028	up
Dld	Dihydrolipoyl dehydrogenase, mitochondrial OS=Mus musculus OX=10090 GN=Dld PE=1 SV=2	3.53635	54.238	123.2	89.35	1.37885	0.463466	0.0236648	up
Lamb1	Laminin subunit beta-1 OS=Mus musculus OX=10090 GN=Lamb1 PE=1 SV=3	1.11982	196.961	115.8	84.35	1.37285	0.457174	0.0254462	up
Tmprss13	Transmembrane protease serine 13 OS=Mus musculus OX=10090 GN=Tmprss13 PE=2 SV=2	1.4733	59.768	119	86.75	1.37176	0.456028	0.025784	up
Itgam	Integrin alpha-M OS=Mus musculus OX=10090 GN=Itgam PE=1 SV=2	1.47441	127.4	114.5	83.8	1.36635	0.450327	0.0275178	up
Nop16	Nucleolar protein 16 OS=Mus musculus OX=10090 GN=Nop16 PE=1 SV=1	3.93258	21.126	126.3	92.9	1.35953	0.443108	0.0298579	up
Bmp1	Bone morphogenetic protein 1 OS=Mus musculus OX=10090 GN=Bmp1 PE=1 SV=2	1.00908	111.595	119.4	88.55	1.34839	0.431238	0.0340743	up
Atf6	Cyclic AMP-dependent transcription factor ATF-6 alpha OS=Mus musculus OX=10090 GN=Atf6 PE=1 SV=2	2.43902	72.649	121.8	91.05	1.33773	0.419787	0.0386179	up
Srl	Sarcalumenin OS=Mus musculus OX=10090 GN=Srl PE=1 SV=1	1.0989	99.123	124.9	93.9	1.33014	0.411578	0.0421809	up
Gnb1	Guanine nucleotide-binding protein G(I)/G(S)/G(T) subunit beta-1 OS=Mus musculus OX=10090 GN=Gnb1 PE=1 SV=3	2.94118	37.353	114.2	86	1.32791	0.409157	0.0432843	up
Col10a1	Collagen alpha-1(X) chain OS=Mus musculus OX=10090 GN=Col10a1 PE=2 SV=1	2.64706	66.734	112	84.6	1.32388	0.404772	0.0453438	up
Adcy5	Adenylate cyclase type 5 OS=Mus musculus OX=10090 GN=Adcy5 PE=1 SV=2	0.554675	139.032	109	82.45	1.32201	0.402733	0.046326	up
Gstm1	Glutathione S-transferase Mu 1 OS=Mus musculus OX=10090 GN=Gstm1 PE=1 SV=2	7.33945	25.953	115.9	87.95	1.31779	0.39812	0.0486214	up
Klk1	Kallikrein-1 OS=Mus musculus OX=10090 GN=Klk1 PE=1 SV=3	4.98084	28.756	112.8	87.25	1.29284	0.370544	0.0644297	up
Vnn1	Pantetheinase OS=Mus musculus OX=10090 GN=Vnn1 PE=1 SV=3	3.71094	57.054	109.5	84.8	1.29127	0.368791	0.0655584	up
Scaf1	Splicing factor, arginine/serine-rich 19 OS=Mus musculus OX=10090 GN=Scaf1 PE=1 SV=1	1.3535	133.761	110.2	85.5	1.28889	0.366129	0.0673144	up
Mbl2	Mannose-binding protein C OS=Mus musculus OX=10090 GN=Mbl2 PE=1 SV=2	47.9508	25.941	111.9	87	1.28621	0.363126	0.0693395	up
Alb	Serum albumin OS=Mus musculus OX=10090 GN=Alb PE=1 SV=3	10.6908	68.648	114.6	89.4	1.28188	0.358261	0.0727218	up
Nucb1	Nucleobindin-1 OS=Mus musculus OX=10090 GN=Nucb1 PE=1 SV=2	33.3333	53.376	116.9	91.95	1.27134	0.34635	0.0815769	up
Obscn	Obscurin OS=Mus musculus OX=10090 GN=Obscn PE=1 SV=2	0.202452	965.767	104.7	82.5	1.26909	0.343794	0.0835891	up
Apof	Apolipoprotein F OS=Mus musculus OX=10090 GN=Apof PE=2 SV=2	13.0159	34.337	113.9	89.8	1.26837	0.342976	0.0842386	up
Lama2	Laminin subunit alpha-2 OS=Mus musculus OX=10090 GN=Lama2 PE=1 SV=2	0.481078	343.593	107.9	85.2	1.26643	0.340767	0.0860211	up
Pdia6	Protein disulfide-isomerase A6 OS=Mus musculus OX=10090 GN=Pdia6 PE=1 SV=3	3.18182	48.07	104.9	82.95	1.26462	0.338704	0.0877164	up
Lcn2	Neutrophil gelatinase-associated lipocalin OS=Mus musculus OX=10090 GN=Lcn2 PE=1 SV=1	10.5	22.861	121.4	96.25	1.2613	0.334911	0.0908929	up
Krt15	Keratin, type I cytoskeletal 15 OS=Mus musculus OX=10090 GN=Krt15 PE=1 SV=2	8.84956	49.107	110.1	87.75	1.2547	0.327342	0.0975094	up
Ak1	Adenylate kinase isoenzyme 1 OS=Mus musculus OX=10090 GN=Ak1 PE=1 SV=1	30.4124	21.526	113.9	90.9	1.25303	0.325421	0.0992554	up
Mptx1	Mucosal pentraxin OS=Mus musculus OX=10090 GN=Mptx1 PE=2 SV=1	11.8721	24.523	107.8	86.15	1.25131	0.323439	0.101076	up
Napsa	Napsin-A OS=Mus musculus OX=10090 GN=Napsa PE=1 SV=1	7.87589	45.516	112.8	90.15	1.25125	0.32337	0.101137	up
Fabp3	Fatty acid-binding protein, heart OS=Mus musculus OX=10090 GN=Fabp3 PE=1 SV=5	13.5338	14.81	111.7	89.4	1.24944	0.321282	0.103083	up
Npl	N-acetylneuraminate lyase OS=Mus musculus OX=10090 GN=Npl PE=1 SV=1	5.9375	35.108	116.4	93.2	1.24893	0.320693	0.103642	up
Gsto1	Glutathione S-transferase omega-1 OS=Mus musculus OX=10090 GN=Gsto1 PE=1 SV=2	38.3333	27.48	112.8	91.45	1.23346	0.302711	0.121746	up
Serpina7	Thyroxine-binding globulin OS=Mus musculus OX=10090 GN=Serpina7 PE=2 SV=1	22.2488	47.022	98.9	80.35	1.23087	0.299678	0.125038	up
Apoe	Apolipoprotein E OS=Mus musculus OX=10090 GN=Apoe PE=1 SV=2	54.9839	35.844	110.2	89.65	1.22922	0.297743	0.127157	up
Apoc3	Apolipoprotein C-III OS=Mus musculus OX=10090 GN=Apoc3 PE=1 SV=2	50.5051	10.975	108.8	88.55	1.22868	0.297109	0.127862	up
Nos1	Nitric oxide synthase, brain OS=Mus musculus OX=10090 GN=Nos1 PE=1 SV=1	0.489853	160.371	110.5	90.05	1.2271	0.295253	0.129954	up
Cpb2	Carboxypeptidase B2 OS=Mus musculus OX=10090 GN=Cpb2 PE=1 SV=1	34.8341	48.84	111.9	91.5	1.22295	0.290365	0.13555	up
Antxr2	Anthrax toxin receptor 2 OS=Mus musculus OX=10090 GN=Antxr2 PE=1 SV=1	12.9363	53.151	106.7	87.3	1.22222	0.289504	0.136554	up
Pam	Peptidyl-glycine alpha-amidating monooxygenase OS=Mus musculus OX=10090 GN=Pam PE=1 SV=2	1.32789	108.894	105.9	86.8	1.22005	0.28694	0.139593	up
Ptgds	Prostaglandin-H2 D-isomerase OS=Mus musculus OX=10090 GN=Ptgds PE=1 SV=1	12.6984	21.053	107.8	88.45	1.21877	0.285426	0.141404	up
Mif	Macrophage migration inhibitory factor OS=Mus musculus OX=10090 GN=Mif PE=1 SV=2	6.08696	12.496	110.6	91.15	1.21338	0.279031	0.149253	up
Lgmn	Legumain OS=Mus musculus OX=10090 GN=Lgmn PE=1 SV=1	3.90805	49.341	111.4	91.95	1.21153	0.27683	0.152044	up
Ctsc	Dipeptidyl peptidase 1 OS=Mus musculus OX=10090 GN=Ctsc PE=1 SV=1	6.70996	52.343	108.7	89.75	1.21114	0.276366	0.15263	up
Krt5	Keratin, type II cytoskeletal 5 OS=Mus musculus OX=10090 GN=Krt5 PE=1 SV=1	15.3448	61.729	106.2	87.85	1.20888	0.273671	0.156103	up
C1sb	Complement C1s-B subcomponent OS=Mus musculus OX=10090 GN=C1sb PE=2 SV=1	13.2267	76.651	110.3	91.3	1.20811	0.272752	0.157305	up
Apoc4	Apolipoprotein C-IV OS=Mus musculus OX=10090 GN=Apoc4 PE=1 SV=1	21.7742	14.279	111	92	1.20652	0.270852	0.159791	up
S100a1	Protein S100-A1 OS=Mus musculus OX=10090 GN=S100a1 PE=1 SV=2	15.9574	10.498	107	88.75	1.20563	0.269787	0.161199	up
Fuca1	Tissue alpha-L-fucosidase OS=Mus musculus OX=10090 GN=Fuca1 PE=1 SV=1	4.86726	52.247	115.5	95.95	1.20375	0.267536	0.164217	up
Pdpk1	3-phosphoinositide-dependent protein kinase 1 OS=Mus musculus OX=10090 GN=Pdpk1 PE=1 SV=2	1.43113	63.718	109.1	90.7	1.20287	0.266481	0.165654	up
Vat1	Synaptic vesicle membrane protein VAT-1 homolog OS=Mus musculus OX=10090 GN=Vat1 PE=1 SV=3	5.91133	43.069	109.5	91.3	1.19934	0.262241	0.171476	up
Man2b2	Epididymis-specific alpha-mannosidase OS=Mus musculus OX=10090 GN=Man2b2 PE=1 SV=2	1.17878	115.537	105.6	88.25	1.1966	0.258941	0.176123	up
C1qtnf3	Complement C1q tumor necrosis factor-related protein 3 OS=Mus musculus OX=10090 GN=C1qtnf3 PE=2 SV=1	2.84553	26.811	105.5	88.25	1.19547	0.257578	0.178074	up
Minpp1	Multiple inositol polyphosphate phosphatase 1 OS=Mus musculus OX=10090 GN=Minpp1 PE=1 SV=3	8.31601	54.503	111.8	93.75	1.19253	0.254026	0.183209	up
Krt2	Keratin, type II cytoskeletal 2 epidermal OS=Mus musculus OX=10090 GN=Krt2 PE=1 SV=1	7.92079	70.88	103.6	86.95	1.19149	0.252767	0.185066	up
Got1	Aspartate aminotransferase, cytoplasmic OS=Mus musculus OX=10090 GN=Got1 PE=1 SV=3	7.99031	46.219	109.8	92.3	1.1896	0.250477	0.188466	up
Mb	Myoglobin OS=Mus musculus OX=10090 GN=Mb PE=1 SV=3	46.1039	17.059	109.9	92.4	1.18939	0.250222	0.188839	up
Ndrg2	Protein NDRG2 OS=Mus musculus OX=10090 GN=Ndrg2 PE=1 SV=1	1.88679	40.763	109.4	92.15	1.18719	0.247551	0.192866	up
Ttn	Titin OS=Mus musculus OX=10090 GN=Ttn PE=1 SV=1	0.019879	3904.05	115.6	97.4	1.18686	0.24715	0.193489	up
Cfl2	Cofilin-2 OS=Mus musculus OX=10090 GN=Cfl2 PE=1 SV=1	22.8916	18.698	112.4	94.85	1.18503	0.244924	0.196902	up
Mup20	Major urinary protein 20 OS=Mus musculus OX=10090 GN=Mup20 PE=1 SV=1	58.011	20.916	112.8	95.3	1.18363	0.243218	0.199544	up
Mmp3	Stromelysin-1 OS=Mus musculus OX=10090 GN=Mmp3 PE=2 SV=2	2.51572	53.811	108.3	91.55	1.18296	0.242401	0.200821	up
Apob	Apolipoprotein B-100 OS=Mus musculus OX=10090 GN=Apob PE=1 SV=1	46.2597	509.113	113.8	96.2	1.18295	0.242389	0.200837	up
Insl3	Insulin-like 3 OS=Mus musculus OX=10090 GN=Insl3 PE=1 SV=2	9.01639	13.577	110.4	93.45	1.18138	0.240473	0.203857	up
H3f3c	Histone H3.3C OS=Mus musculus OX=10090 GN=H3f3c PE=3 SV=3	5.14706	15.305	110.4	93.55	1.18012	0.238934	0.20631	up
Mertk	Tyrosine-protein kinase Mer OS=Mus musculus OX=10090 GN=Mertk PE=1 SV=1	5.73441	110.088	111	94.45	1.17523	0.232943	0.216044	up
App	Amyloid-beta A4 protein OS=Mus musculus OX=10090 GN=App PE=1 SV=3	3.24675	86.667	109.5	93.3	1.17363	0.230978	0.21929	up
Apcs	Serum amyloid P-component OS=Mus musculus OX=10090 GN=Apcs PE=1 SV=2	33.9286	26.23	126.5	107.9	1.17238	0.22944	0.22187	up
Cdh1	Cadherin-1 OS=Mus musculus OX=10090 GN=Cdh1 PE=1 SV=1	9.04977	98.195	104.6	89.35	1.17068	0.227347	0.225423	up
Tpm3	Tropomyosin alpha-3 chain OS=Mus musculus OX=10090 GN=Tpm3 PE=1 SV=3	20	32.974	115.9	99.05	1.17012	0.226656	0.226602	up
Dpp4	Dipeptidyl peptidase 4 OS=Mus musculus OX=10090 GN=Dpp4 PE=1 SV=3	6.31579	87.381	105.4	90.2	1.16851	0.22467	0.229997	up
Vim	Vimentin OS=Mus musculus OX=10090 GN=Vim PE=1 SV=3	5.36481	53.655	116.7	99.9	1.16817	0.22425	0.230736	up
Smpd1	Sphingomyelin phosphodiesterase OS=Mus musculus OX=10090 GN=Smpd1 PE=1 SV=2	2.39234	69.882	107.2	92.05	1.16458	0.21981	0.238498	up
Pdxk	Pyridoxal kinase OS=Mus musculus OX=10090 GN=Pdxk PE=1 SV=1	6.73077	34.993	105.7	90.85	1.16346	0.218422	0.240985	up
H2afx	Histone H2AX OS=Mus musculus OX=10090 GN=H2afx PE=1 SV=2	4.8951	15.133	111.3	95.8	1.1618	0.216362	0.244683	up
Nme2	Nucleoside diphosphate kinase B OS=Mus musculus OX=10090 GN=Nme2 PE=1 SV=1	36.8421	17.352	103.7	89.3	1.16125	0.215679	0.245898	up
Itih4	Inter alpha-trypsin inhibitor, heavy chain 4 OS=Mus musculus OX=10090 GN=Itih4 PE=1 SV=2	63.3758	104.594	112.1	96.75	1.15866	0.212457	0.251796	up
Psapl1	Proactivator polypeptide-like 1 OS=Mus musculus OX=10090 GN=Psapl1 PE=1 SV=2	2.68199	57.023	114.8	99.15	1.15784	0.211436	0.253668	up
Il6st	Interleukin-6 receptor subunit beta OS=Mus musculus OX=10090 GN=Il6st PE=1 SV=2	2.39913	102.387	108.8	94	1.15745	0.21095	0.25458	up
Inmt	Indolethylamine N-methyltransferase OS=Mus musculus OX=10090 GN=Inmt PE=1 SV=1	6.43939	29.441	107.8	93.15	1.15727	0.210725	0.254981	up
F8	Coagulation factor VIII OS=Mus musculus OX=10090 GN=F8 PE=2 SV=2	0.862441	266.027	99.5	86.05	1.1563	0.209516	0.257231	up
Dennd5a	DENN domain-containing protein 5A OS=Mus musculus OX=10090 GN=Dennd5a PE=1 SV=1	1.3986	146.56	109.6	94.9	1.1549	0.207768	0.260522	up
Hrg	Histidine-rich glycoprotein OS=Mus musculus OX=10090 GN=Hrg PE=1 SV=2	43.2381	59.126	107.9	93.45	1.15463	0.207431	0.261162	up
Pla2g7	Platelet-activating factor acetylhydrolase OS=Mus musculus OX=10090 GN=Pla2g7 PE=2 SV=2	30	49.227	105	90.95	1.15448	0.207243	0.261511	up
Rnf8	E3 ubiquitin-protein ligase RNF8 OS=Mus musculus OX=10090 GN=Rnf8 PE=1 SV=1	1.63934	55.481	112.9	98	1.15204	0.204191	0.267321	up
Pglyrp2	N-acetylmuramoyl-L-alanine amidase OS=Mus musculus OX=10090 GN=Pglyrp2 PE=1 SV=1	24.3396	57.671	105.8	91.85	1.15188	0.20399	0.267712	up
C1sa	Complement C1s-A subcomponent OS=Mus musculus OX=10090 GN=C1sa PE=2 SV=2	36.3372	76.808	109.4	95	1.15158	0.203615	0.268433	up
Pcsk9	Proprotein convertase subtilisin/kexin type 9 OS=Mus musculus OX=10090 GN=Pcsk9 PE=1 SV=2	1.29683	74.776	105.8	91.9	1.15125	0.203201	0.269223	up
Naga	Alpha-N-acetylgalactosaminidase OS=Mus musculus OX=10090 GN=Naga PE=1 SV=2	6.0241	47.204	108.8	94.85	1.14707	0.197953	0.279462	up
Sdf4	45 kDa calcium-binding protein OS=Mus musculus OX=10090 GN=Sdf4 PE=1 SV=1	2.49307	42.037	110.4	96.7	1.14168	0.191158	0.293143	up
Tfrc	Transferrin receptor protein 1 OS=Mus musculus OX=10090 GN=Tfrc PE=1 SV=1	8.78113	85.677	106.8	93.55	1.14164	0.191108	0.293246	up
Serpina10	Protein Z-dependent protease inhibitor OS=Mus musculus OX=10090 GN=Serpina10 PE=1 SV=1	33.2589	51.764	107.6	94.3	1.14104	0.190349	0.294788	up
Serpina3k	Serine protease inhibitor A3K OS=Mus musculus OX=10090 GN=Serpina3k PE=1 SV=2	42.3445	46.85	111.9	98.2	1.13951	0.188414	0.29877	up
Ctse	Cathepsin E OS=Mus musculus OX=10090 GN=Ctse PE=1 SV=2	9.57179	42.91	107.1	94.05	1.13876	0.187464	0.300752	up
Serpinc1	Antithrombin-III OS=Mus musculus OX=10090 GN=Serpinc1 PE=1 SV=1	63.0108	51.971	104	91.45	1.13723	0.185524	0.304781	up
Dap	Death-associated protein 1 OS=Mus musculus OX=10090 GN=Dap PE=1 SV=3	7.84314	11.148	110.8	97.45	1.13699	0.18522	0.30542	up
Card9	Caspase recruitment domain-containing protein 9 OS=Mus musculus OX=10090 GN=Card9 PE=1 SV=1	2.23881	62.423	106	93.25	1.13673	0.18489	0.306124	up
Obp1b	Odorant-binding protein 1b OS=Mus musculus OX=10090 GN=Obp1b PE=1 SV=1	9.94152	19.382	107.2	94.4	1.13559	0.183442	0.309167	up
Serpina1d	Alpha-1-antitrypsin 1-4 OS=Mus musculus OX=10090 GN=Serpina1d PE=1 SV=1	64.891	45.969	107.4	94.65	1.13471	0.182324	0.311556	up
Man2a1	Alpha-mannosidase 2 OS=Mus musculus OX=10090 GN=Man2a1 PE=1 SV=2	1.30435	131.548	100.9	89	1.13371	0.181052	0.314267	up
Serpina1a	Alpha-1-antitrypsin 1-1 OS=Mus musculus OX=10090 GN=Serpina1a PE=1 SV=4	63.6804	45.974	107.2	94.6	1.13319	0.18039	0.315672	up
Fhdc1	FH2 domain-containing protein 1 OS=Mus musculus OX=10090 GN=Fhdc1 PE=1 SV=3	0.609225	125.29	107.2	94.65	1.13259	0.179626	0.317311	up
Saa4	Serum amyloid A-4 protein OS=Mus musculus OX=10090 GN=Saa4 PE=1 SV=2	61.5385	15.078	111.9	98.9	1.13145	0.178173	0.32047	up
Serpina3c	Serine protease inhibitor A3C OS=Mus musculus OX=10090 GN=Serpina3c PE=2 SV=1	31.8945	46.737	108.8	96.2	1.13098	0.177573	0.321767	up
Krt79	Keratin, type II cytoskeletal 79 OS=Mus musculus OX=10090 GN=Krt79 PE=1 SV=2	6.40301	57.517	102.1	90.3	1.13068	0.177191	0.322603	up
Vta1	Vacuolar protein sorting-associated protein VTA1 homolog OS=Mus musculus OX=10090 GN=Vta1 PE=1 SV=1	4.53074	33.892	108.4	96.1	1.12799	0.173754	0.33012	up
Anxa1	Annexin A1 OS=Mus musculus OX=10090 GN=Anxa1 PE=1 SV=2	3.75723	38.71	105	93.1	1.12782	0.173537	0.330607	up
Siae	Sialate O-acetylesterase OS=Mus musculus OX=10090 GN=Siae PE=1 SV=3	1.2939	60.736	102.5	90.95	1.12699	0.172475	0.332951	up
Btd	Biotinidase OS=Mus musculus OX=10090 GN=Btd PE=1 SV=2	27.5	58.117	102.6	91.05	1.12685	0.172295	0.333348	up
Apoa5	Apolipoprotein A-V OS=Mus musculus OX=10090 GN=Apoa5 PE=1 SV=1	13.587	41.237	107.4	95.35	1.12638	0.171694	0.334707	up
Bpgm	Bisphosphoglycerate mutase OS=Mus musculus OX=10090 GN=Bpgm PE=1 SV=2	25.4826	29.96	109.8	97.5	1.12615	0.171399	0.335343	up
Manba	Beta-mannosidase OS=Mus musculus OX=10090 GN=Manba PE=1 SV=1	2.61661	100.767	109.6	97.4	1.12526	0.170258	0.337915	up
Crp	C-reactive protein OS=Mus musculus OX=10090 GN=Crp PE=1 SV=2	42.6667	25.344	105.1	93.45	1.12467	0.169502	0.339618	up
Pkhd1l1	Fibrocystin-L OS=Mus musculus OX=10090 GN=Pkhd1l1 PE=1 SV=1	0.729583	464.439	103	91.6	1.12445	0.16922	0.340228	up
Msln	Mesothelin OS=Mus musculus OX=10090 GN=Msln PE=1 SV=1	2.88	69.379	105.1	93.55	1.12346	0.167949	0.3431	up
S100a9	Protein S100-A9 OS=Mus musculus OX=10090 GN=S100a9 PE=1 SV=3	45.1327	13.04	108.5	96.7	1.12203	0.166111	0.347296	up
Fgl1	Fibrinogen-like protein 1 OS=Mus musculus OX=10090 GN=Fgl1 PE=1 SV=2	16.242	36.416	113.1	100.8	1.12202	0.166098	0.347305	up
Ldhc	L-lactate dehydrogenase C chain OS=Mus musculus OX=10090 GN=Ldhc PE=1 SV=2	18.3735	35.889	119.6	106.65	1.12143	0.16534	0.349065	up
Ces1	Liver carboxylesterase 1 OS=Mus musculus OX=10090 GN=Ces1 PE=1 SV=1	5.30973	62.64	99.5	88.75	1.12113	0.164954	0.349945	up
Ldhb	L-lactate dehydrogenase B chain OS=Mus musculus OX=10090 GN=Ldhb PE=1 SV=2	8.08383	36.549	106.3	94.85	1.12072	0.164426	0.351156	up
Glud1	Glutamate dehydrogenase 1, mitochondrial OS=Mus musculus OX=10090 GN=Glud1 PE=1 SV=1	1.43369	61.298	106.4	95.15	1.11823	0.161217	0.358557	up
Pglyrp1	Peptidoglycan recognition protein 1 OS=Mus musculus OX=10090 GN=Pglyrp1 PE=1 SV=1	6.59341	20.476	106.7	95.45	1.11786	0.16074	0.359674	up
Prap1	Proline-rich acidic protein 1 OS=Mus musculus OX=10090 GN=Prap1 PE=2 SV=1	6.71141	16.787	111	99.3	1.11782	0.160688	0.359789	up
Qsox1	Sulfhydryl oxidase 1 OS=Mus musculus OX=10090 GN=Qsox1 PE=1 SV=1	45.0535	82.733	109	97.55	1.11738	0.16012	0.361143	up
Prcp	Lysosomal Pro-X carboxypeptidase OS=Mus musculus OX=10090 GN=Prcp PE=1 SV=2	10.5906	54.991	107.7	96.45	1.11664	0.159164	0.363367	up
Extl2	Exostosin-like 2 OS=Mus musculus OX=10090 GN=Extl2 PE=1 SV=1	4.24242	37.366	105.7	94.75	1.11557	0.157781	0.366635	up
Mug2	Murinoglobulin-2 OS=Mus musculus OX=10090 GN=Mug2 PE=1 SV=2	23.9145	162.279	104.6	93.8	1.11514	0.157225	0.367945	up
Igfals	Insulin-like growth factor-binding protein complex acid labile subunit OS=Mus musculus OX=10090 GN=Igfals PE=1 SV=1	36.8159	66.918	104.9	94.3	1.11241	0.153689	0.376377	up
Chil3	Chitinase-like protein 3 OS=Mus musculus OX=10090 GN=Chil3 PE=1 SV=2	5.52764	44.43	110.6	99.45	1.11212	0.153312	0.377282	up
Cdh17	Cadherin-17 OS=Mus musculus OX=10090 GN=Cdh17 PE=1 SV=1	1.9347	91.588	104.2	93.7	1.11206	0.153235	0.37746	up
Ide	Insulin-degrading enzyme OS=Mus musculus OX=10090 GN=Ide PE=1 SV=1	1.47203	117.697	108.4	97.5	1.11179	0.152884	0.378287	up
Cand1	Cullin-associated NEDD8-dissociated protein 1 OS=Mus musculus OX=10090 GN=Cand1 PE=1 SV=2	1.05691	136.245	106.1	95.55	1.11041	0.151092	0.38262	up
Hist1h4a	Histone H4 OS=Mus musculus OX=10090 GN=Hist1h4a PE=1 SV=2	38.835	11.36	108.8	98.05	1.10964	0.150092	0.385068	up
Fetub	Fetuin-B OS=Mus musculus OX=10090 GN=Fetub PE=1 SV=1	48.1959	42.685	105	94.65	1.10935	0.149715	0.38598	up
Col6a1	Collagen alpha-1(VI) chain OS=Mus musculus OX=10090 GN=Col6a1 PE=1 SV=1	3.12195	108.422	102.9	92.8	1.10884	0.149051	0.387612	up
Adgrl4	Adhesion G protein-coupled receptor L4 OS=Mus musculus OX=10090 GN=Adgrl4 PE=2 SV=3	2.16509	82.192	104.5	94.25	1.10875	0.148934	0.387875	up
Lbp	Lipopolysaccharide-binding protein OS=Mus musculus OX=10090 GN=Lbp PE=1 SV=2	20.79	53.022	108.2	97.6	1.10861	0.148752	0.388342	up
Ace	Angiotensin-converting enzyme OS=Mus musculus OX=10090 GN=Ace PE=1 SV=3	26.8293	150.822	104.8	94.55	1.10841	0.148492	0.388974	up
Usp5	Ubiquitin carboxyl-terminal hydrolase 5 OS=Mus musculus OX=10090 GN=Usp5 PE=1 SV=1	1.8648	95.772	104.2	94.15	1.10674	0.146316	0.394303	up
Krt1	Keratin, type II cytoskeletal 1 OS=Mus musculus OX=10090 GN=Krt1 PE=1 SV=4	5.96546	65.565	104	94.05	1.10579	0.145077	0.397368	up
Fam20c	Extracellular serine/threonine protein kinase FAM20C OS=Mus musculus OX=10090 GN=Fam20c PE=1 SV=1	10.7081	65.724	103.4	93.55	1.10529	0.144425	0.399	up
Itga2	Integrin alpha-2 OS=Mus musculus OX=10090 GN=Itga2 PE=1 SV=2	1.18846	128.874	102	92.3	1.10509	0.144164	0.399647	up
Gpx3	Glutathione peroxidase 3 OS=Mus musculus OX=10090 GN=Gpx3 PE=1 SV=2	41.5929	25.409	102.3	92.6	1.10475	0.14372	0.400755	up
L1cam	Neural cell adhesion molecule L1 OS=Mus musculus OX=10090 GN=L1cam PE=1 SV=1	5.55556	140.881	101	91.85	1.09962	0.137005	0.417716	up
Man1a1	Mannosyl-oligosaccharide 1,2-alpha-mannosidase IA OS=Mus musculus OX=10090 GN=Man1a1 PE=1 SV=1	27.3282	73.23	102.4	93.15	1.0993	0.136585	0.418779	up
Amy1	Alpha-amylase 1 OS=Mus musculus OX=10090 GN=Amy1 PE=1 SV=2	35.8121	57.607	103.2	94	1.09787	0.134707	0.423602	up
Ext1	Exostosin-1 OS=Mus musculus OX=10090 GN=Ext1 PE=1 SV=1	3.08311	86.253	102.4	93.45	1.09577	0.131945	0.430752	up
Cycs	Cytochrome c, somatic OS=Mus musculus OX=10090 GN=Cycs PE=1 SV=2	38.0952	11.598	99.2	90.6	1.09492	0.130825	0.433672	up
Lgals3bp	Galectin-3-binding protein OS=Mus musculus OX=10090 GN=Lgals3bp PE=1 SV=1	9.18544	64.45	103.9	95	1.09368	0.129191	0.437949	up
Pros1	Vitamin K-dependent protein S OS=Mus musculus OX=10090 GN=Pros1 PE=2 SV=1	26.0741	74.886	103.8	94.95	1.09321	0.128571	0.439605	up
Ltf	Lactotransferrin OS=Mus musculus OX=10090 GN=Ltf PE=1 SV=4	47.3833	77.788	107.4	98.25	1.09313	0.128465	0.439874	up
Actn4	Alpha-actinin-4 OS=Mus musculus OX=10090 GN=Actn4 PE=1 SV=1	8.66228	104.911	100.6	92.05	1.09288	0.128135	0.440727	up
H6pd	GDH/6PGL endoplasmic bifunctional protein OS=Mus musculus OX=10090 GN=H6pd PE=1 SV=2	10.8999	88.872	103.8	95.1	1.09148	0.126286	0.445625	up
Ces3a	Carboxylesterase 3A OS=Mus musculus OX=10090 GN=Ces3a PE=1 SV=2	14.8862	63.277	106.7	98.1	1.08767	0.121241	0.459149	up
Lamc1	Laminin subunit gamma-1 OS=Mus musculus OX=10090 GN=Lamc1 PE=1 SV=2	0.995644	177.185	104.4	96	1.0875	0.121015	0.459742	up
Ggh	Gamma-glutamyl hydrolase OS=Mus musculus OX=10090 GN=Ggh PE=1 SV=2	19.8738	35.447	104.7	96.3	1.08723	0.120657	0.460719	up
Tgoln2	Trans-Golgi network integral membrane protein 2 OS=Mus musculus OX=10090 GN=Tgoln2 PE=1 SV=1	2.47934	38.798	105	96.7	1.08583	0.118798	0.465743	up
Col1a2	Collagen alpha-2(I) chain OS=Mus musculus OX=10090 GN=Col1a2 PE=1 SV=2	8.74636	129.478	104.5	96.25	1.08571	0.118639	0.46617	up
Tcn2	Transcobalamin-2 OS=Mus musculus OX=10090 GN=Tcn2 PE=1 SV=1	38.1395	47.555	102.7	94.6	1.08562	0.118519	0.466498	up
B4galt1	Beta-1,4-galactosyltransferase 1 OS=Mus musculus OX=10090 GN=B4galt1 PE=1 SV=1	5.26316	44.383	103.1	95.05	1.08469	0.117283	0.469876	up
Nop14	Nucleolar protein 14 OS=Mus musculus OX=10090 GN=Nop14 PE=1 SV=2	1.04651	98.708	100.9	93.1	1.08378	0.116072	0.473197	up
Procr	Endothelial protein C receptor OS=Mus musculus OX=10090 GN=Procr PE=1 SV=3	7.02479	27.172	102.8	94.9	1.08325	0.115366	0.475155	up
Gc	Vitamin D-binding protein OS=Mus musculus OX=10090 GN=Gc PE=1 SV=2	85.084	53.565	104.7	96.75	1.08217	0.113927	0.479104	up
Cd44	CD44 antigen OS=Mus musculus OX=10090 GN=Cd44 PE=1 SV=3	2.69923	85.565	99.6	92.05	1.08202	0.113727	0.479656	up
Krt10	Keratin, type I cytoskeletal 10 OS=Mus musculus OX=10090 GN=Krt10 PE=1 SV=3	11.2281	57.735	99.7	92.15	1.08193	0.113607	0.479984	up
Erap1	Endoplasmic reticulum aminopeptidase 1 OS=Mus musculus OX=10090 GN=Erap1 PE=1 SV=2	8.8172	106.531	103.4	95.6	1.08159	0.113154	0.481245	up
Asgr1	Asialoglycoprotein receptor 1 OS=Mus musculus OX=10090 GN=Asgr1 PE=1 SV=4	3.87324	32.571	110.1	101.8	1.08153	0.113074	0.481458	up
Ctsl	Cathepsin L1 OS=Mus musculus OX=10090 GN=Ctsl PE=1 SV=2	8.68263	37.523	105.7	97.75	1.08133	0.112807	0.482206	up
Lysmd3	LysM and putative peptidoglycan-binding domain-containing protein 3 OS=Mus musculus OX=10090 GN=Lysmd3 PE=2 SV=1	2.29508	34.236	97.7	90.4	1.08075	0.112033	0.484347	up
Cgref1	Cell growth regulator with EF hand domain protein 1 OS=Mus musculus OX=10090 GN=Cgref1 PE=1 SV=1	14.5907	30.828	101.2	93.65	1.08062	0.111859	0.48484	up
Pltp	Phospholipid transfer protein OS=Mus musculus OX=10090 GN=Pltp PE=1 SV=1	31.8458	54.419	98.9	91.55	1.08028	0.111405	0.486086	up
Ctso	Cathepsin O OS=Mus musculus OX=10090 GN=Ctso PE=2 SV=1	3.20513	34.701	106.5	98.6	1.08012	0.111192	0.486689	up
Alcam	CD166 antigen OS=Mus musculus OX=10090 GN=Alcam PE=1 SV=3	2.40137	65.051	102.2	94.65	1.07977	0.110724	0.488009	up
Dag1	Dystroglycan OS=Mus musculus OX=10090 GN=Dag1 PE=1 SV=4	1.79171	96.844	105.1	97.35	1.07961	0.11051	0.488598	up
Colec11	Collectin-11 OS=Mus musculus OX=10090 GN=Colec11 PE=2 SV=2	18.0147	28.97	100	92.65	1.07933	0.110136	0.489639	up
Spint1	Kunitz-type protease inhibitor 1 OS=Mus musculus OX=10090 GN=Spint1 PE=1 SV=2	5.91716	56.554	99.7	92.5	1.07784	0.108143	0.495239	up
Ctsa	Lysosomal protective protein OS=Mus musculus OX=10090 GN=Ctsa PE=1 SV=1	18.9873	53.809	102.8	95.4	1.07757	0.107782	0.496255	up
Angptl3	Angiopoietin-related protein 3 OS=Mus musculus OX=10090 GN=Angptl3 PE=1 SV=1	10.3297	52.51	101.7	94.45	1.07676	0.106697	0.499307	up
Col1a1	Collagen alpha-1(I) chain OS=Mus musculus OX=10090 GN=Col1a1 PE=1 SV=4	8.60289	137.948	106.1	98.7	1.07497	0.104296	0.506095	up
Dus2	tRNA-dihydrouridine(20) synthase [NAD(P)+]-like OS=Mus musculus OX=10090 GN=Dus2 PE=1 SV=1	1.41988	55.289	100.5	93.6	1.07372	0.102618	0.510908	up
Psma5	Proteasome subunit alpha type-5 OS=Mus musculus OX=10090 GN=Psma5 PE=1 SV=1	29.4606	26.394	99.8	92.95	1.0737	0.102591	0.510995	up
Plxnd1	Plexin-D1 OS=Mus musculus OX=10090 GN=Plxnd1 PE=1 SV=1	0.779221	211.473	104.2	97.05	1.07367	0.102551	0.51108	up
Tnc	Tenascin OS=Mus musculus OX=10090 GN=Tnc PE=1 SV=1	11.9431	231.659	103.5	96.5	1.07254	0.101031	0.515451	up
Serpina3g	Serine protease inhibitor A3G OS=Mus musculus OX=10090 GN=Serpina3g PE=1 SV=2	14.7727	48.99	106.8	99.6	1.07229	0.100695	0.516417	up
Btnl10	Butyrophilin-like protein 10 OS=Mus musculus OX=10090 GN=Btnl10 PE=1 SV=2	4.72727	29.53	103.6	96.65	1.07191	0.100184	0.517889	up
Lta4h	Leukotriene A-4 hydrolase OS=Mus musculus OX=10090 GN=Lta4h PE=1 SV=4	8.18331	69.007	99.2	92.55	1.07185	0.100103	0.518106	up
Lgals1	Galectin-1 OS=Mus musculus OX=10090 GN=Lgals1 PE=1 SV=3	17.7778	14.856	102.6	95.9	1.06986	0.097422	0.525852	up
Tgfbi	Transforming growth factor-beta-induced protein ig-h3 OS=Mus musculus OX=10090 GN=Tgfbi PE=1 SV=1	18.3016	74.55	100.4	93.85	1.06979	0.0973276	0.526134	up
S100a6	Protein S100-A6 OS=Mus musculus OX=10090 GN=S100a6 PE=1 SV=3	24.7191	10.044	103	96.4	1.06846	0.0955329	0.531348	up
Lpl	Lipoprotein lipase OS=Mus musculus OX=10090 GN=Lpl PE=1 SV=3	6.75105	53.076	101.8	95.3	1.06821	0.0951953	0.532369	up
Aldob	Fructose-bisphosphate aldolase B OS=Mus musculus OX=10090 GN=Aldob PE=1 SV=3	4.12088	39.482	101.9	95.4	1.06813	0.0950872	0.532651	up
Tgfb1	Transforming growth factor beta-1 OS=Mus musculus OX=10090 GN=Tgfb1 PE=1 SV=1	11.5385	44.282	102.3	95.85	1.06729	0.0939522	0.535978	up
Serpina1b	Alpha-1-antitrypsin 1-2 OS=Mus musculus OX=10090 GN=Serpina1b PE=1 SV=2	60.5327	45.946	104.4	97.9	1.06639	0.0927352	0.539544	up
Plod1	Procollagen-lysine,2-oxoglutarate 5-dioxygenase 1 OS=Mus musculus OX=10090 GN=Plod1 PE=1 SV=1	11.1264	83.542	103.3	96.9	1.06605	0.0922751	0.540925	up
Gigyf2	GRB10-interacting GYF protein 2 OS=Mus musculus OX=10090 GN=Gigyf2 PE=1 SV=2	0.542215	149.102	94.2	88.45	1.06501	0.090867	0.545074	up
Dpep1	Dipeptidase 1 OS=Mus musculus OX=10090 GN=Dpep1 PE=1 SV=2	4.87805	45.693	101.6	95.4	1.06499	0.0908399	0.54515	up
Chad	Chondroadherin OS=Mus musculus OX=10090 GN=Chad PE=2 SV=1	3.91061	40.323	110.8	104.2	1.06334	0.088603	0.551781	up
N4bp1	NEDD4-binding protein 1 OS=Mus musculus OX=10090 GN=N4bp1 PE=1 SV=2	1.34378	99.085	105.2	98.95	1.06316	0.0883587	0.552493	up
Retnla	Resistin-like alpha OS=Mus musculus OX=10090 GN=Retnla PE=1 SV=1	13.5135	11.928	101.2	95.2	1.06303	0.0881823	0.55305	up
Pygm	Glycogen phosphorylase, muscle form OS=Mus musculus OX=10090 GN=Pygm PE=1 SV=3	10.3325	97.225	98.7	92.85	1.063	0.0881416	0.553132	up
Creg1	Protein CREG1 OS=Mus musculus OX=10090 GN=Creg1 PE=1 SV=1	3.18182	24.436	105.2	99.15	1.06102	0.0854519	0.561192	up
Mgat5	Alpha-1,6-mannosylglycoprotein 6-beta-N-acetylglucosaminyltransferase A OS=Mus musculus OX=10090 GN=Mgat5 PE=2 SV=1	1.35135	84.496	105.5	99.45	1.06083	0.0851935	0.561943	up
C3	Complement C3 OS=Mus musculus OX=10090 GN=C3 PE=1 SV=3	72.0986	186.366	103	97.15	1.06022	0.0843637	0.564469	up
Fkbp1a	Peptidyl-prolyl cis-trans isomerase FKBP1A OS=Mus musculus OX=10090 GN=Fkbp1a PE=1 SV=2	12.963	11.915	98.9	93.3	1.06002	0.0840915	0.565267	up
Runx2	Runt-related transcription factor 2 OS=Mus musculus OX=10090 GN=Runx2 PE=1 SV=2	1.15321	66.163	101.6	95.95	1.05888	0.0825391	0.569932	up
Arhgap10	Rho GTPase-activating protein 10 OS=Mus musculus OX=10090 GN=Arhgap10 PE=1 SV=2	0.890585	89.309	98.9	93.45	1.05832	0.0817759	0.572259	up
Gnpda2	Glucosamine-6-phosphate isomerase 2 OS=Mus musculus OX=10090 GN=Gnpda2 PE=1 SV=1	5.7971	31.064	104.7	99	1.05758	0.0807668	0.575334	up
Nrp1	Neuropilin-1 OS=Mus musculus OX=10090 GN=Nrp1 PE=1 SV=2	1.73348	102.935	106.4	100.65	1.05713	0.0801528	0.577186	up
Lrrn4	Leucine-rich repeat neuronal protein 4 OS=Mus musculus OX=10090 GN=Lrrn4 PE=1 SV=2	3.41064	80.438	105.1	99.45	1.05681	0.079716	0.578498	up
Sult1c2	Sulfotransferase 1C2 OS=Mus musculus OX=10090 GN=Sult1c2 PE=1 SV=1	7.09459	34.93	104.6	99	1.05657	0.0793884	0.579523	up
Reg1	Lithostathine-1 OS=Mus musculus OX=10090 GN=Reg1 PE=1 SV=1	10.303	18.507	102.9	97.5	1.05538	0.0777625	0.584445	up
Serpind1	Heparin cofactor 2 OS=Mus musculus OX=10090 GN=Serpind1 PE=1 SV=1	45.8159	54.462	102	96.65	1.05535	0.0777215	0.584571	up
Ceacam1	Carcinoembryonic antigen-related cell adhesion molecule 1 OS=Mus musculus OX=10090 GN=Ceacam1 PE=1 SV=1	6.14203	56.981	102.2	96.9	1.0547	0.0768327	0.587327	up
Slc38a10	Putative sodium-coupled neutral amino acid transporter 10 OS=Mus musculus OX=10090 GN=Slc38a10 PE=1 SV=2	1.19266	117.12	97.4	92.35	1.05468	0.0768053	0.587379	up
Afm	Afamin OS=Mus musculus OX=10090 GN=Afm PE=1 SV=2	62.3355	69.334	99.6	94.55	1.05341	0.0750671	0.592725	up
Angpt1	Angiopoietin-1 OS=Mus musculus OX=10090 GN=Angpt1 PE=1 SV=2	3.41365	57.482	106.8	101.45	1.05274	0.0741492	0.595575	up
C8g	Complement component C8 gamma chain OS=Mus musculus OX=10090 GN=C8g PE=1 SV=1	73.7624	22.494	106.1	100.8	1.05258	0.0739299	0.596234	up
Pcyox1	Prenylcysteine oxidase OS=Mus musculus OX=10090 GN=Pcyox1 PE=1 SV=1	24.9505	56.459	100.2	95.2	1.05252	0.0738476	0.596481	up
Cavin2	Caveolae-associated protein 2 OS=Mus musculus OX=10090 GN=Cavin2 PE=1 SV=3	2.15311	46.735	96.6	91.85	1.05171	0.0727369	0.599896	up
C1ra	Complement C1r-A subcomponent OS=Mus musculus OX=10090 GN=C1ra PE=1 SV=1	30.8345	80.022	104.9	99.75	1.05163	0.0726272	0.600259	up
Ctbs	Di-N-acetylchitobiase OS=Mus musculus OX=10090 GN=Ctbs PE=1 SV=2	21.3115	41.268	100.1	95.35	1.04982	0.070142	0.607981	up
Serpina6	Corticosteroid-binding globulin OS=Mus musculus OX=10090 GN=Serpina6 PE=1 SV=1	32.4937	44.74	91.7	87.35	1.0498	0.0701145	0.608053	up
Fap	Prolyl endopeptidase FAP OS=Mus musculus OX=10090 GN=Fap PE=1 SV=1	19.5795	87.889	100.3	95.55	1.04971	0.0699908	0.608427	up
Ogn	Mimecan OS=Mus musculus OX=10090 GN=Ogn PE=1 SV=1	7.71812	33.991	101.4	96.75	1.04806	0.0677213	0.615511	up
Col12a1	Collagen alpha-1(XII) chain OS=Mus musculus OX=10090 GN=Col12a1 PE=2 SV=3	2.05128	340.004	101	96.4	1.04772	0.0672532	0.616994	up
Prdx1	Peroxiredoxin-1 OS=Mus musculus OX=10090 GN=Prdx1 PE=1 SV=1	30.6533	22.162	105.4	100.6	1.04771	0.0672394	0.617011	up
Oaf	Out at first protein homolog OS=Mus musculus OX=10090 GN=Oaf PE=2 SV=1	14.8936	31.504	103.1	98.45	1.04723	0.0665783	0.61909	up
Ces1c	Carboxylesterase 1C OS=Mus musculus OX=10090 GN=Ces1c PE=1 SV=4	43.6823	61.017	94.8	90.55	1.04694	0.0661788	0.620373	up
Serpinf1	Pigment epithelium-derived factor OS=Mus musculus OX=10090 GN=Serpinf1 PE=1 SV=2	47.2422	46.205	102.6	98.05	1.0464	0.0654344	0.622671	up
Kng1	Kininogen-1 OS=Mus musculus OX=10090 GN=Kng1 PE=1 SV=1	39.0318	73.056	101.2	96.8	1.04545	0.0641241	0.626799	up
Hexb	Beta-hexosaminidase subunit beta OS=Mus musculus OX=10090 GN=Hexb PE=1 SV=2	6.52985	61.077	101.4	97	1.04536	0.0639999	0.627206	up
Tfpi	Tissue factor pathway inhibitor OS=Mus musculus OX=10090 GN=Tfpi PE=2 SV=1	18.6275	34.964	97.3	93.15	1.04455	0.0628816	0.630734	up
Mrc1	Macrophage mannose receptor 1 OS=Mus musculus OX=10090 GN=Mrc1 PE=1 SV=2	5.42582	164.874	101.6	97.3	1.04419	0.0623842	0.632301	up
Ghr	Growth hormone receptor OS=Mus musculus OX=10090 GN=Ghr PE=1 SV=1	10.7692	72.737	102.9	98.65	1.04308	0.0608498	0.637173	up
Lamp1	Lysosome-associated membrane glycoprotein 1 OS=Mus musculus OX=10090 GN=Lamp1 PE=1 SV=2	5.66502	43.837	106.3	101.95	1.04267	0.0602826	0.638991	up
Plxnb2	Plexin-B2 OS=Mus musculus OX=10090 GN=Plxnb2 PE=1 SV=1	1.9544	206.099	102	97.85	1.04241	0.0599228	0.640118	up
Lgalsl	Galectin-related protein OS=Mus musculus OX=10090 GN=Lgalsl PE=1 SV=1	5.23256	18.944	94.9	91.05	1.04228	0.0597429	0.640679	up
Cfb	Complement factor B OS=Mus musculus OX=10090 GN=Cfb PE=1 SV=2	54.2707	84.951	102.4	98.25	1.04224	0.0596875	0.640879	up
Prss2	Anionic trypsin-2 OS=Mus musculus OX=10090 GN=Prss2 PE=1 SV=1	8.13008	26.187	100.9	96.85	1.04182	0.059106	0.64274	up
Mup3	Major urinary protein 3 OS=Mus musculus OX=10090 GN=Mup3 PE=1 SV=1	54.8913	21.451	104	99.85	1.04156	0.0587459	0.643865	up
Col11a2	Collagen alpha-2(XI) chain OS=Mus musculus OX=10090 GN=Col11a2 PE=2 SV=3	0.633641	171.431	98.6	94.9	1.03899	0.0551818	0.655292	up
Moap1	Modulator of apoptosis 1 OS=Mus musculus OX=10090 GN=Moap1 PE=1 SV=1	3.125	39.379	108.6	104.55	1.03874	0.0548346	0.656411	up
F12	Coagulation factor XII OS=Mus musculus OX=10090 GN=F12 PE=1 SV=2	26.1307	65.658	100.3	96.6	1.0383	0.0542233	0.658356	up
Chit1	Chitotriosidase-1 OS=Mus musculus OX=10090 GN=Chit1 PE=1 SV=2	4.31034	51.079	102.9	99.15	1.03782	0.0535562	0.660508	up
Orm2	Alpha-1-acid glycoprotein 2 OS=Mus musculus OX=10090 GN=Orm2 PE=1 SV=1	24.6377	23.828	111.7	107.75	1.03666	0.0519428	0.665728	up
Adipoq	Adiponectin OS=Mus musculus OX=10090 GN=Adipoq PE=1 SV=2	24.6964	26.792	94.5	91.2	1.03618	0.0512746	0.667865	up
Pdgfra	Platelet-derived growth factor receptor alpha OS=Mus musculus OX=10090 GN=Pdgfra PE=1 SV=3	5.05051	122.606	101.9	98.35	1.0361	0.0511633	0.668264	up
Dsg2	Desmoglein-2 OS=Mus musculus OX=10090 GN=Dsg2 PE=1 SV=3	8.82353	122.309	98.9	95.5	1.0356	0.0504669	0.670491	up
Man2b1	Lysosomal alpha-mannosidase OS=Mus musculus OX=10090 GN=Man2b1 PE=1 SV=4	24.8766	114.576	102.8	99.4	1.03421	0.0485292	0.676816	up
Enpep	Glutamyl aminopeptidase OS=Mus musculus OX=10090 GN=Enpep PE=1 SV=1	4.2328	107.888	99.2	96	1.03333	0.0473011	0.68078	up
Mmp8	Neutrophil collagenase OS=Mus musculus OX=10090 GN=Mmp8 PE=2 SV=2	1.50538	53.092	104.7	101.35	1.03305	0.0469101	0.682053	up
Lipc	Hepatic triacylglycerol lipase OS=Mus musculus OX=10090 GN=Lipc PE=2 SV=2	8.23529	57.352	99.1	95.95	1.03283	0.0466028	0.683075	up
Ctsz	Cathepsin Z OS=Mus musculus OX=10090 GN=Ctsz PE=1 SV=1	24.8366	33.974	102.3	99.1	1.03229	0.0458483	0.685536	up
Mmp2	72 kDa type IV collagenase OS=Mus musculus OX=10090 GN=Mmp2 PE=1 SV=1	32.6284	74.055	100.7	97.6	1.03176	0.0451074	0.687953	up
Apoa1	Apolipoprotein A-I OS=Mus musculus OX=10090 GN=Apoa1 PE=1 SV=2	81.0606	30.597	96.9	93.95	1.0314	0.044604	0.689613	up
Me1	NADP-dependent malic enzyme OS=Mus musculus OX=10090 GN=Me1 PE=1 SV=2	16.4336	63.913	101.6	98.55	1.03095	0.0439744	0.691682	up
Ecm1	Extracellular matrix protein 1 OS=Mus musculus OX=10090 GN=Ecm1 PE=1 SV=2	20.0358	62.792	100.8	97.8	1.03067	0.0435825	0.69294	up
Fnta	Protein farnesyltransferase/geranylgeranyltransferase type-1 subunit alpha OS=Mus musculus OX=10090 GN=Fnta PE=1 SV=1	3.97878	43.986	101.8	98.85	1.02984	0.0424202	0.696767	up
Srgn	Serglycin OS=Mus musculus OX=10090 GN=Srgn PE=1 SV=1	28.9474	16.701	101.8	98.85	1.02984	0.0424202	0.696767	up
Atp6v1a	V-type proton ATPase catalytic subunit A OS=Mus musculus OX=10090 GN=Atp6v1a PE=1 SV=2	2.91734	68.283	104.8	101.8	1.02947	0.0419018	0.698491	up
Prdx2	Peroxiredoxin-2 OS=Mus musculus OX=10090 GN=Prdx2 PE=1 SV=3	38.8889	21.765	101.4	98.5	1.02944	0.0418597	0.698619	up
Kit	Mast/stem cell growth factor receptor Kit OS=Mus musculus OX=10090 GN=Kit PE=1 SV=3	2.55363	109.273	100.3	97.45	1.02925	0.0415934	0.699523	up
Tgfbr3	Transforming growth factor beta receptor type 3 OS=Mus musculus OX=10090 GN=Tgfbr3 PE=1 SV=1	2.58824	93.769	100.4	97.55	1.02922	0.0415514	0.699662	up
Amy2	Pancreatic alpha-amylase OS=Mus musculus OX=10090 GN=Amy2 PE=1 SV=2	22.6378	57.282	100.8	98	1.02857	0.04064	0.70264	up
Prep	Prolyl endopeptidase OS=Mus musculus OX=10090 GN=Prep PE=1 SV=1	1.12676	80.7	102.7	99.85	1.02854	0.0405979	0.702773	up
Manf	Mesencephalic astrocyte-derived neurotrophic factor OS=Mus musculus OX=10090 GN=Manf PE=1 SV=1	8.37989	20.361	103.3	100.55	1.02735	0.0389278	0.708307	up
Rbp4	Retinol-binding protein 4 OS=Mus musculus OX=10090 GN=Rbp4 PE=1 SV=2	59.204	23.191	96.2	93.7	1.02668	0.0379866	0.711418	up
F5	Coagulation factor V OS=Mus musculus OX=10090 GN=F5 PE=1 SV=1	23.8662	247.076	101.4	98.8	1.02632	0.0374806	0.713119	up
Bche	Cholinesterase OS=Mus musculus OX=10090 GN=Bche PE=1 SV=2	22.0564	68.418	94	91.6	1.0262	0.0373119	0.713655	up
B4galnt1	Beta-1,4 N-acetylgalactosaminyltransferase 1 OS=Mus musculus OX=10090 GN=B4galnt1 PE=1 SV=1	2.06379	59.175	96.5	94.05	1.02605	0.037101	0.71436	up
Gpx1	Glutathione peroxidase 1 OS=Mus musculus OX=10090 GN=Gpx1 PE=1 SV=2	19.403	22.316	99.6	97.15	1.02522	0.0359335	0.718244	up
Cd97	CD97 antigen OS=Mus musculus OX=10090 GN=Cd97 PE=1 SV=2	1.46699	90.354	99	96.6	1.02484	0.0353987	0.719995	up
Hbb-b1	Hemoglobin subunit beta-1 OS=Mus musculus OX=10090 GN=Hbb-b1 PE=1 SV=2	59.8639	15.83	101.8	99.4	1.02414	0.0344129	0.723278	up
Gsr	Glutathione reductase, mitochondrial OS=Mus musculus OX=10090 GN=Gsr PE=1 SV=3	6.2	53.629	100.4	98.1	1.02345	0.0334406	0.726566	up
Igfbp3	Insulin-like growth factor-binding protein 3 OS=Mus musculus OX=10090 GN=Igfbp3 PE=2 SV=2	22.9452	31.666	99.7	97.45	1.02309	0.0329331	0.728246	up
Agt	Angiotensinogen OS=Mus musculus OX=10090 GN=Agt PE=1 SV=1	31.8658	51.958	100	97.8	1.02249	0.0320867	0.731046	up
Lyve1	Lymphatic vessel endothelial hyaluronic acid receptor 1 OS=Mus musculus OX=10090 GN=Lyve1 PE=1 SV=1	15.4088	34.551	100.6	98.4	1.02236	0.0319033	0.731694	up
Stfa1	Stefin-1 OS=Mus musculus OX=10090 GN=Stfa1 PE=3 SV=1	19.5876	10.999	103.9	101.65	1.02213	0.0315787	0.732747	up
Pygb	Glycogen phosphorylase, brain form OS=Mus musculus OX=10090 GN=Pygb PE=1 SV=3	3.91459	96.668	88.8	86.9	1.02186	0.0311976	0.734027	up
Plxdc2	Plexin domain-containing protein 2 OS=Mus musculus OX=10090 GN=Plxdc2 PE=1 SV=1	7.35849	59.578	101.6	99.45	1.02162	0.0308587	0.735187	up
Igfbp7	Insulin-like growth factor-binding protein 7 OS=Mus musculus OX=10090 GN=Igfbp7 PE=1 SV=3	2.4911	28.951	100.7	98.6	1.0213	0.0304067	0.736706	up
Loxl1	Lysyl oxidase homolog 1 OS=Mus musculus OX=10090 GN=Loxl1 PE=2 SV=3	5.93081	66.465	100.7	98.7	1.02026	0.0289369	0.741616	up
Proz	Vitamin K-dependent protein Z OS=Mus musculus OX=10090 GN=Proz PE=1 SV=1	23.3083	44.275	99.5	97.55	1.01999	0.028555	0.742918	up
Krt76	Keratin, type II cytoskeletal 2 oral OS=Mus musculus OX=10090 GN=Krt76 PE=1 SV=1	5.38721	62.806	100.3	98.35	1.01983	0.0283287	0.743692	up
Apoh	Beta-2-glycoprotein 1 OS=Mus musculus OX=10090 GN=Apoh PE=1 SV=1	58.5507	38.593	98.3	96.45	1.01918	0.0274089	0.74677	up
Mcam	Cell surface glycoprotein MUC18 OS=Mus musculus OX=10090 GN=Mcam PE=1 SV=1	6.17284	71.501	99.5	97.65	1.01895	0.0270833	0.747895	up
Ppp1ca	Serine/threonine-protein phosphatase PP1-alpha catalytic subunit OS=Mus musculus OX=10090 GN=Ppp1ca PE=1 SV=1	13.0303	37.516	100.6	98.75	1.01873	0.0267717	0.748902	up
Apoa2	Apolipoprotein A-II OS=Mus musculus OX=10090 GN=Apoa2 PE=1 SV=2	43.1373	11.302	95.4	93.75	1.0176	0.0251706	0.754327	up
F7	Coagulation factor VII OS=Mus musculus OX=10090 GN=F7 PE=1 SV=1	26.009	50.244	100.5	98.8	1.01721	0.0246176	0.756214	up
Slc4a1	Band 3 anion transport protein OS=Mus musculus OX=10090 GN=Slc4a1 PE=1 SV=1	0.968784	103.07	95.5	93.9	1.01704	0.0243764	0.757015	up
Sell	L-selectin OS=Mus musculus OX=10090 GN=Sell PE=1 SV=1	11.828	42.26	100.2	98.55	1.01674	0.0239508	0.758439	up
C8b	Complement component C8 beta chain OS=Mus musculus OX=10090 GN=C8b PE=1 SV=1	52.6316	66.186	104.8	103.15	1.016	0.0229004	0.76203	up
Ptprg	Receptor-type tyrosine-protein phosphatase gamma OS=Mus musculus OX=10090 GN=Ptprg PE=1 SV=1	3.25936	161.141	96.7	95.2	1.01576	0.0225596	0.763185	up
Vtn	Vitronectin OS=Mus musculus OX=10090 GN=Vtn PE=1 SV=2	34.728	54.814	101.2	99.65	1.01555	0.0222613	0.764157	up
Ca2	Carbonic anhydrase 2 OS=Mus musculus OX=10090 GN=Ca2 PE=1 SV=4	53.8462	29.015	101.3	99.75	1.01554	0.0222471	0.764233	up
Ctsb	Cathepsin B OS=Mus musculus OX=10090 GN=Ctsb PE=1 SV=2	40.708	37.256	99.4	97.9	1.01532	0.0219345	0.765279	up
Itih1	Inter-alpha-trypsin inhibitor heavy chain H1 OS=Mus musculus OX=10090 GN=Itih1 PE=1 SV=2	40.1323	101.004	100.1	98.65	1.0147	0.0210533	0.768289	up
Postn	Periostin OS=Mus musculus OX=10090 GN=Postn PE=1 SV=2	34.0095	93.085	99.5	98.15	1.01375	0.0197019	0.772855	up
C8a	Complement component C8 alpha chain OS=Mus musculus OX=10090 GN=C8a PE=1 SV=1	60.9881	66.038	104.5	103.2	1.0126	0.0180644	0.778473	up
Dkk3	Dickkopf-related protein 3 OS=Mus musculus OX=10090 GN=Dkk3 PE=2 SV=1	24.9284	38.363	99.2	98.05	1.01173	0.0168243	0.782697	up
Selenop	Selenoprotein P OS=Mus musculus OX=10090 GN=Selenop PE=1 SV=3	29.7368	42.689	100	98.9	1.01112	0.0159542	0.785654	up
Rad23a	UV excision repair protein RAD23 homolog A OS=Mus musculus OX=10090 GN=Rad23a PE=1 SV=2	4.6832	39.682	95.8	94.85	1.01002	0.0143839	0.791062	up
Prkcsh	Glucosidase 2 subunit beta OS=Mus musculus OX=10090 GN=Prkcsh PE=1 SV=1	1.53551	58.756	97.6	96.65	1.00983	0.0141124	0.791975	up
Grn	Granulins OS=Mus musculus OX=10090 GN=Grn PE=1 SV=2	20.8829	63.413	103.4	102.4	1.00977	0.0140267	0.792287	up
Lrp1	Prolow-density lipoprotein receptor-related protein 1 OS=Mus musculus OX=10090 GN=Lrp1 PE=1 SV=1	5.54455	504.411	99.8	98.95	1.00859	0.0123398	0.798053	up
Rarres2	Retinoic acid receptor responder protein 2 OS=Mus musculus OX=10090 GN=Rarres2 PE=1 SV=1	17.284	18.338	101.1	100.25	1.00848	0.0121825	0.798601	up
Serping1	Plasma protease C1 inhibitor OS=Mus musculus OX=10090 GN=Serping1 PE=1 SV=3	35.7143	55.549	97.7	97.05	1.0067	0.00963382	0.807375	up
Adh5	Alcohol dehydrogenase class-3 OS=Mus musculus OX=10090 GN=Adh5 PE=1 SV=3	2.13904	39.522	96.5	95.95	1.00573	0.00824305	0.812147	up
Itgb2	Integrin beta-2 OS=Mus musculus OX=10090 GN=Itgb2 PE=1 SV=2	5.18807	84.97	99	98.45	1.00559	0.00804221	0.812868	up
Lcp1	Plastin-2 OS=Mus musculus OX=10090 GN=Lcp1 PE=1 SV=4	41.9458	70.105	95.9	95.4	1.00524	0.00753998	0.81458	up
Cpq	Carboxypeptidase Q OS=Mus musculus OX=10090 GN=Cpq PE=1 SV=1	23.617	51.78	97.9	97.45	1.00462	0.0066499	0.81767	up
Dcn	Decorin OS=Mus musculus OX=10090 GN=Dcn PE=1 SV=1	1.9774	39.784	96.2	95.9	1.00313	0.00450858	0.825077	up
Gnptg	N-acetylglucosamine-1-phosphotransferase subunit gamma OS=Mus musculus OX=10090 GN=Gnptg PE=1 SV=1	12.0521	34.147	98.2	97.9	1.00306	0.00440791	0.825395	up
Lamp2	Lysosome-associated membrane glycoprotein 2 OS=Mus musculus OX=10090 GN=Lamp2 PE=1 SV=2	7.71084	45.652	98.4	98.2	1.00204	0.0029401	0.830521	up
C9	Complement component C9 OS=Mus musculus OX=10090 GN=C9 PE=1 SV=2	48.3577	61.962	104.2	104	1.00192	0.00276732	0.831089	up
Ahcy	Adenosylhomocysteinase OS=Mus musculus OX=10090 GN=Ahcy PE=1 SV=3	4.86111	47.657	104.9	104.7	1.00191	0.00275292	0.831153	up
Il1rap	Interleukin-1 receptor accessory protein OS=Mus musculus OX=10090 GN=Il1rap PE=1 SV=1	31.4035	65.699	96.7	96.6	1.00104	0.00149962	0.835529	up
Pzp	Pregnancy zone protein OS=Mus musculus OX=10090 GN=Pzp PE=1 SV=3	60.2007	165.748	97.1	97	1.00103	0.00148521	0.83555	up
Plvap	Plasmalemma vesicle-associated protein OS=Mus musculus OX=10090 GN=Plvap PE=1 SV=1	2.05479	49.902	98.6	98.5	1.00102	0.0014708	0.835629	up
Lrrc7	Leucine-rich repeat-containing protein 7 OS=Mus musculus OX=10090 GN=Lrrc7 PE=1 SV=2	1.00671	166.796	102.6	102.7	0.999026	-0.00140587	0.845608	down
Ica	Inhibitor of carbonic anhydrase OS=Mus musculus OX=10090 GN=Ica PE=1 SV=1	60.4286	76.715	99.1	99.2	0.998992	-0.00145497	0.845781	down
Hyou1	Hypoxia up-regulated protein 1 OS=Mus musculus OX=10090 GN=Hyou1 PE=1 SV=1	9.20921	111.112	99.1	99.2	0.998992	-0.00145497	0.845781	down
Hspg2	Basement membrane-specific heparan sulfate proteoglycan core protein OS=Mus musculus OX=10090 GN=Hspg2 PE=1 SV=1	0.728352	398.039	101.1	101.35	0.997533	-0.00356353	0.853129	down
Mbl1	Mannose-binding protein A OS=Mus musculus OX=10090 GN=Mbl1 PE=1 SV=1	52.3013	25.38	98.5	98.75	0.997468	-0.00365754	0.853457	down
Cfd	Complement factor D OS=Mus musculus OX=10090 GN=Cfd PE=1 SV=1	39.7683	28.039	98.8	99.1	0.996973	-0.00437366	0.855959	down
Lcat	Phosphatidylcholine-sterol acyltransferase OS=Mus musculus OX=10090 GN=Lcat PE=1 SV=2	25.5708	49.715	97.3	97.6	0.996926	-0.00444167	0.856194	down
Clec11a	C-type lectin domain family 11 member A OS=Mus musculus OX=10090 GN=Clec11a PE=1 SV=1	22.561	36.429	100.6	100.95	0.996533	-0.00501051	0.858182	down
Ctsd	Cathepsin D OS=Mus musculus OX=10090 GN=Ctsd PE=1 SV=1	33.1707	44.925	99.1	99.45	0.996481	-0.0050858	0.858447	down
Cd248	Endosialin OS=Mus musculus OX=10090 GN=Cd248 PE=1 SV=1	3.52941	81.761	98.8	99.2	0.995968	-0.0058287	0.861042	down
Vasn	Vasorin OS=Mus musculus OX=10090 GN=Vasn PE=2 SV=2	7.13224	72.216	98.8	99.2	0.995968	-0.0058287	0.861042	down
Syk	Tyrosine-protein kinase SYK OS=Mus musculus OX=10090 GN=Syk PE=1 SV=2	2.38474	71.331	95.7	96.15	0.99532	-0.00676766	0.864325	down
Thbs4	Thrombospondin-4 OS=Mus musculus OX=10090 GN=Thbs4 PE=1 SV=1	28.1412	106.299	101.5	102.05	0.99461	-0.00779716	0.867923	down
Cdh5	Cadherin-5 OS=Mus musculus OX=10090 GN=Cdh5 PE=1 SV=2	17.0918	87.848	99.4	99.95	0.994497	-0.00796108	0.868499	down
Colec10	Collectin-10 OS=Mus musculus OX=10090 GN=Colec10 PE=2 SV=1	8.30325	30.504	96.6	97.15	0.994339	-0.0081903	0.869304	down
Nme1	Nucleoside diphosphate kinase A OS=Mus musculus OX=10090 GN=Nme1 PE=1 SV=1	36.8421	17.197	96.2	96.75	0.994315	-0.00822512	0.869423	down
Sparcl1	SPARC-like protein 1 OS=Mus musculus OX=10090 GN=Sparcl1 PE=1 SV=3	32.3077	72.243	96.9	97.5	0.993846	-0.00890578	0.871807	down
Gp5	Platelet glycoprotein V OS=Mus musculus OX=10090 GN=Gp5 PE=1 SV=1	20.1058	63.428	100.9	101.55	0.993599	-0.00926437	0.873063	down
Gm2a	Ganglioside GM2 activator OS=Mus musculus OX=10090 GN=Gm2a PE=1 SV=2	7.77202	20.811	101.6	102.3	0.993157	-0.0099063	0.875312	down
Igf1	Insulin-like growth factor I OS=Mus musculus OX=10090 GN=Igf1 PE=1 SV=2	17.6471	17.082	99.5	100.2	0.993014	-0.010114	0.876043	down
Mbp	Myelin basic protein OS=Mus musculus OX=10090 GN=Mbp PE=1 SV=2	4	27.151	102.7	103.45	0.99275	-0.0104976	0.877387	down
F9	Coagulation factor IX OS=Mus musculus OX=10090 GN=F9 PE=2 SV=3	21.6561	52.944	99.6	100.35	0.992526	-0.0108232	0.878529	down
Cp	Ceruloplasmin OS=Mus musculus OX=10090 GN=Cp PE=1 SV=2	62.1112	121.074	96.6	97.35	0.992296	-0.0111576	0.879704	down
Isoc1	Isochorismatase domain-containing protein 1 OS=Mus musculus OX=10090 GN=Isoc1 PE=1 SV=1	12.1212	32.012	96.5	97.3	0.991778	-0.0119109	0.882347	down
Cfh	Complement factor H OS=Mus musculus OX=10090 GN=Cfh PE=1 SV=2	62.8039	139.047	101.1	102.05	0.990691	-0.0134929	0.887904	down
Enpp2	Ectonucleotide pyrophosphatase/phosphodiesterase family member 2 OS=Mus musculus OX=10090 GN=Enpp2 PE=1 SV=3	15.4292	98.821	98.2	99.15	0.990419	-0.0138891	0.889298	down
Ptma	Prothymosin alpha OS=Mus musculus OX=10090 GN=Ptma PE=1 SV=2	12.6126	12.247	101.3	102.45	0.988775	-0.0162858	0.897726	down
Avp	Vasopressin-neurophysin 2-copeptin OS=Mus musculus OX=10090 GN=Avp PE=2 SV=1	5.35714	17.887	104.7	105.9	0.988669	-0.0164405	0.898273	down
Ambp	Protein AMBP OS=Mus musculus OX=10090 GN=Ambp PE=1 SV=2	39.255	39.004	99.2	100.6	0.986084	-0.0202175	0.911583	down
F10	Coagulation factor X OS=Mus musculus OX=10090 GN=F10 PE=1 SV=1	33.4719	53.983	98.5	99.9	0.985986	-0.0203609	0.912086	down
Tkt	Transketolase OS=Mus musculus OX=10090 GN=Tkt PE=1 SV=1	16.5329	67.588	97.6	99.05	0.985361	-0.0212757	0.915314	down
Ganab	Neutral alpha-glucosidase AB OS=Mus musculus OX=10090 GN=Ganab PE=1 SV=1	6.46186	106.844	101.1	102.7	0.984421	-0.0226527	0.920176	down
Chga	Chromogranin-A OS=Mus musculus OX=10090 GN=Chga PE=1 SV=1	11.4471	51.758	91.2	92.7	0.983819	-0.0235352	0.923293	down
Gsn	Gelsolin OS=Mus musculus OX=10090 GN=Gsn PE=1 SV=3	60.5128	85.888	96.8	98.45	0.98324	-0.0243845	0.926291	down
Uap1l1	UDP-N-acetylhexosamine pyrophosphorylase-like protein 1 OS=Mus musculus OX=10090 GN=Uap1l1 PE=1 SV=1	1.38067	56.578	95.2	96.85	0.982963	-0.024791	0.927727	down
Podxl	Podocalyxin OS=Mus musculus OX=10090 GN=Podxl PE=1 SV=2	1.98807	53.356	97.7	99.5	0.98191	-0.0263373	0.933198	down
Dbi	Acyl-CoA-binding protein OS=Mus musculus OX=10090 GN=Dbi PE=1 SV=2	39.0805	9.994	95.6	97.45	0.981016	-0.0276514	0.937845	down
Fstl1	Follistatin-related protein 1 OS=Mus musculus OX=10090 GN=Fstl1 PE=1 SV=2	14.0523	34.532	99.7	101.65	0.980817	-0.0279441	0.938883	down
Qdpr	Dihydropteridine reductase OS=Mus musculus OX=10090 GN=Qdpr PE=1 SV=2	2.90456	25.554	96.9	98.85	0.980273	-0.0287445	0.941713	down
Azgp1	Zinc-alpha-2-glycoprotein OS=Mus musculus OX=10090 GN=Azgp1 PE=1 SV=2	52.1173	35.31	95.9	97.85	0.980072	-0.0290404	0.942763	down
Dpep2	Dipeptidase 2 OS=Mus musculus OX=10090 GN=Dpep2 PE=1 SV=1	11.5063	52.631	95.7	97.7	0.979529	-0.0298399	0.945591	down
Psmb6	Proteasome subunit beta type-6 OS=Mus musculus OX=10090 GN=Psmb6 PE=1 SV=3	29.8319	25.362	97.8	99.85	0.979469	-0.0299283	0.945903	down
C2	Complement C2 OS=Mus musculus OX=10090 GN=C2 PE=1 SV=2	34.2105	84.687	100.2	102.35	0.978994	-0.0306281	0.948384	down
Habp2	Hyaluronan-binding protein 2 OS=Mus musculus OX=10090 GN=Habp2 PE=1 SV=2	24.7312	62.316	98.1	100.25	0.978554	-0.0312766	0.950682	down
Nbl1	Neuroblastoma suppressor of tumorigenicity 1 OS=Mus musculus OX=10090 GN=Nbl1 PE=1 SV=2	3.93258	19.094	97.6	99.75	0.978446	-0.0314359	0.951243	down
Rhoc	Rho-related GTP-binding protein RhoC OS=Mus musculus OX=10090 GN=Rhoc PE=1 SV=2	5.69948	21.992	92.3	94.35	0.978272	-0.0316924	0.952151	down
Pm20d1	N-fatty-acyl-amino acid synthase/hydrolase PM20D1 OS=Mus musculus OX=10090 GN=Pm20d1 PE=1 SV=1	3.97614	55.628	100.4	102.7	0.977605	-0.0326764	0.955641	down
Mansc1	MANSC domain-containing protein 1 OS=Mus musculus OX=10090 GN=Mansc1 PE=2 SV=1	3.62319	44.794	98.4	100.7	0.97716	-0.0333333	0.957968	down
Psmb1	Proteasome subunit beta type-1 OS=Mus musculus OX=10090 GN=Psmb1 PE=1 SV=1	17.5	26.355	97.8	100.1	0.977023	-0.0335356	0.958684	down
Clu	Clusterin OS=Mus musculus OX=10090 GN=Clu PE=1 SV=1	43.5268	51.623	99.4	101.75	0.976904	-0.0337113	0.959306	down
Piga	N-acetylglucosaminyl-phosphatidylinositol biosynthetic protein OS=Mus musculus OX=10090 GN=Piga PE=2 SV=1	1.4433	54.434	94.1	96.35	0.976648	-0.0340894	0.960649	down
H2-L	H-2 class I histocompatibility antigen, L-D alpha chain OS=Mus musculus OX=10090 GN=H2-L PE=1 SV=2	15.7459	40.685	95.6	97.9	0.976507	-0.0342977	0.961387	down
Mdh1	Malate dehydrogenase, cytoplasmic OS=Mus musculus OX=10090 GN=Mdh1 PE=1 SV=3	25.4491	36.488	98.7	101.2	0.975296	-0.036088	0.967731	down
Golm1	Golgi membrane protein 1 OS=Mus musculus OX=10090 GN=Golm1 PE=1 SV=2	2.29008	44.299	98.2	100.7	0.975174	-0.0362684	0.968374	down
Psma2	Proteasome subunit alpha type-2 OS=Mus musculus OX=10090 GN=Psma2 PE=1 SV=3	20.0855	25.91	96.2	98.8	0.973684	-0.0384745	0.976197	down
H2-D1	H-2 class I histocompatibility antigen, D-K alpha chain OS=Mus musculus OX=10090 GN=H2-D1 PE=1 SV=1	16.0221	40.594	88.9	91.35	0.97318	-0.0392214	0.978847	down
Fth1	Ferritin heavy chain OS=Mus musculus OX=10090 GN=Fth1 PE=1 SV=2	38.4615	21.053	97.5	100.3	0.972084	-0.0408471	0.984617	down
Ftl1	Ferritin light chain 1 OS=Mus musculus OX=10090 GN=Ftl1 PE=1 SV=2	39.8907	20.789	96.2	99.05	0.971227	-0.0421196	0.989133	down
Fcgrt	IgG receptor FcRn large subunit p51 OS=Mus musculus OX=10090 GN=Fcgrt PE=1 SV=1	1.91781	40.067	96.2	99.1	0.970737	-0.0428476	0.991717	down
Cd93	Complement component C1q receptor OS=Mus musculus OX=10090 GN=Cd93 PE=1 SV=1	7.91925	69.309	96.2	99.15	0.970247	-0.043576	0.9943	down
Neo1	Neogenin OS=Mus musculus OX=10090 GN=Neo1 PE=1 SV=1	0.669792	163.058	98.6	101.65	0.969995	-0.0439508	0.99563	down
Gp1ba	Platelet glycoprotein Ib alpha chain OS=Mus musculus OX=10090 GN=Gp1ba PE=1 SV=2	19.2098	80.005	94.3	97.3	0.969168	-0.0451813	1	down
Gpld1	Phosphatidylinositol-glycan-specific phospholipase D OS=Mus musculus OX=10090 GN=Gpld1 PE=1 SV=1	40.2628	93.196	92.3	95.25	0.969029	-0.0453883	0.999504	down
Pecam1	Platelet endothelial cell adhesion molecule OS=Mus musculus OX=10090 GN=Pecam1 PE=1 SV=1	1.10041	81.211	95.1	98.3	0.967447	-0.0477455	0.993833	down
Rab10	Ras-related protein Rab-10 OS=Mus musculus OX=10090 GN=Rab10 PE=1 SV=1	14.5	22.527	91.7	94.85	0.96679	-0.0487255	0.991476	down
Psma1	Proteasome subunit alpha type-1 OS=Mus musculus OX=10090 GN=Psma1 PE=1 SV=1	40.6844	29.528	94.6	97.9	0.966292	-0.0494689	0.98969	down
Itih2	Inter-alpha-trypsin inhibitor heavy chain H2 OS=Mus musculus OX=10090 GN=Itih2 PE=1 SV=1	37.315	105.861	94.8	98.15	0.965869	-0.0501006	0.988169	down
Slc3a2	4F2 cell-surface antigen heavy chain OS=Mus musculus OX=10090 GN=Slc3a2 PE=1 SV=1	7.41445	58.3	93.5	96.85	0.96541	-0.0507863	0.986523	down
Spidr	DNA repair-scaffolding protein OS=Mus musculus OX=10090 GN=Spidr PE=2 SV=1	0.750268	103.232	92.8	96.15	0.965159	-0.0511615	0.985617	down
Ighm	Immunoglobulin heavy constant mu OS=Mus musculus OX=10090 GN=Ighm PE=1 SV=2	18.9427	49.94	92.5	95.85	0.96505	-0.0513244	0.985226	down
Dusp3	Dual specificity protein phosphatase 3 OS=Mus musculus OX=10090 GN=Dusp3 PE=1 SV=1	23.2432	20.459	90.8	94.1	0.964931	-0.0515023	0.984799	down
Ext2	Exostosin-2 OS=Mus musculus OX=10090 GN=Ext2 PE=1 SV=2	5.98886	82.012	98.2	101.8	0.964637	-0.0519419	0.983741	down
Mst1	Hepatocyte growth factor-like protein OS=Mus musculus OX=10090 GN=Mst1 PE=2 SV=2	25.419	80.567	96.4	100.05	0.963518	-0.0536165	0.979717	down
F13b	Coagulation factor XIII B chain OS=Mus musculus OX=10090 GN=F13b PE=1 SV=2	46.4873	76.145	94.8	98.4	0.963415	-0.0537707	0.979343	down
Masp1	Mannan-binding lectin serine protease 1 OS=Mus musculus OX=10090 GN=Masp1 PE=1 SV=2	35.6534	79.916	98.9	102.7	0.962999	-0.0543938	0.977847	down
Masp2	Mannan-binding lectin serine protease 2 OS=Mus musculus OX=10090 GN=Masp2 PE=1 SV=1	33.4307	75.468	96.9	100.65	0.962742	-0.0547789	0.976921	down
Flt4	Vascular endothelial growth factor receptor 3 OS=Mus musculus OX=10090 GN=Flt4 PE=1 SV=1	17.168	152.919	96.1	99.85	0.962444	-0.0552255	0.975846	down
Megf9	Multiple epidermal growth factor-like domains protein 9 OS=Mus musculus OX=10090 GN=Megf9 PE=2 SV=1	1.33333	62.79	94.4	98.1	0.962283	-0.0554669	0.975268	down
Psmb5	Proteasome subunit beta type-5 OS=Mus musculus OX=10090 GN=Psmb5 PE=1 SV=3	15.5303	28.514	95.5	99.25	0.962217	-0.0555658	0.975028	down
Plg	Plasminogen OS=Mus musculus OX=10090 GN=Plg PE=1 SV=3	69.9507	90.749	97	100.95	0.960872	-0.0575838	0.970177	down
Lum	Lumican OS=Mus musculus OX=10090 GN=Lum PE=1 SV=2	37.574	38.241	97	101	0.960396	-0.0582987	0.96846	down
Fbln1	Fibulin-1 OS=Mus musculus OX=10090 GN=Fbln1 PE=1 SV=2	17.305	77.981	94.6	98.55	0.959919	-0.0590154	0.966737	down
Sod3	Extracellular superoxide dismutase [Cu-Zn] OS=Mus musculus OX=10090 GN=Sod3 PE=1 SV=1	37.8486	27.375	94.4	98.35	0.959837	-0.0591387	0.966442	down
Glo1	Lactoylglutathione lyase OS=Mus musculus OX=10090 GN=Glo1 PE=1 SV=3	8.15217	20.796	97.5	101.65	0.959174	-0.0601355	0.964044	down
Comp	Cartilage oligomeric matrix protein OS=Mus musculus OX=10090 GN=Comp PE=1 SV=2	5.43046	82.289	99	103.25	0.958838	-0.060641	0.96283	down
Orm1	Alpha-1-acid glycoprotein 1 OS=Mus musculus OX=10090 GN=Orm1 PE=1 SV=1	34.7826	23.88	100.6	104.95	0.958552	-0.0610714	0.961796	down
Apoc2	Apolipoprotein C-II OS=Mus musculus OX=10090 GN=Apoc2 PE=2 SV=1	30.9278	10.734	89.9	93.8	0.958422	-0.0612671	0.961328	down
Anpep	Aminopeptidase N OS=Mus musculus OX=10090 GN=Anpep PE=1 SV=4	13.354	109.582	91.5	95.5	0.958115	-0.0617293	0.960217	down
Cbr1	Carbonyl reductase [NADPH] 1 OS=Mus musculus OX=10090 GN=Cbr1 PE=1 SV=3	7.94224	30.622	96.8	101.05	0.957942	-0.0619898	0.95959	down
Cd109	CD109 antigen OS=Mus musculus OX=10090 GN=Cd109 PE=1 SV=1	4.36893	161.557	99.3	103.7	0.95757	-0.0625501	0.958245	down
Cpn1	Carboxypeptidase N catalytic chain OS=Mus musculus OX=10090 GN=Cpn1 PE=1 SV=1	41.3567	51.813	93.4	97.6	0.956967	-0.0634589	0.956063	down
Nptn	Neuroplastin OS=Mus musculus OX=10090 GN=Nptn PE=1 SV=3	2.267	44.345	97	101.6	0.954724	-0.0668444	0.947936	down
Gpi	Glucose-6-phosphate isomerase OS=Mus musculus OX=10090 GN=Gpi PE=1 SV=4	16.3082	62.727	97.6	102.25	0.954523	-0.0671481	0.947206	down
Cpn2	Carboxypeptidase N subunit 2 OS=Mus musculus OX=10090 GN=Cpn2 PE=1 SV=2	40.2194	60.441	93.8	98.3	0.954222	-0.0676031	0.946113	down
Psmb4	Proteasome subunit beta type-4 OS=Mus musculus OX=10090 GN=Psmb4 PE=1 SV=1	25.3788	29.097	93.7	98.2	0.954175	-0.0676742	0.945944	down
Klkb1	Plasma kallikrein OS=Mus musculus OX=10090 GN=Klkb1 PE=1 SV=2	50.627	71.336	94.6	99.2	0.953629	-0.0685	0.943962	down
Olfm1	Noelin OS=Mus musculus OX=10090 GN=Olfm1 PE=1 SV=1	12.9897	55.363	94.4	99	0.953535	-0.0686422	0.943622	down
Hgfac	Hepatocyte growth factor activator OS=Mus musculus OX=10090 GN=Hgfac PE=1 SV=1	31.0873	70.522	95.4	100.05	0.953523	-0.0686604	0.943578	down
Ca1	Carbonic anhydrase 1 OS=Mus musculus OX=10090 GN=Ca1 PE=1 SV=4	24.5211	28.313	96.4	101.1	0.953511	-0.0686785	0.943535	down
Scgb1a1	Uteroglobin OS=Mus musculus OX=10090 GN=Scgb1a1 PE=1 SV=1	18.75	10.512	88.8	93.2	0.95279	-0.0697698	0.940914	down
Vwf	von Willebrand factor OS=Mus musculus OX=10090 GN=Vwf PE=1 SV=2	12.0156	309.063	97.6	102.45	0.95266	-0.0699667	0.940443	down
Proc	Vitamin K-dependent protein C OS=Mus musculus OX=10090 GN=Proc PE=1 SV=2	37.3913	51.784	97.3	102.3	0.951124	-0.0722947	0.934861	down
Pi16	Peptidase inhibitor 16 OS=Mus musculus OX=10090 GN=Pi16 PE=1 SV=1	17.1779	52.632	97.1	102.1	0.951028	-0.0724403	0.934513	down
Ifnar2	Interferon alpha/beta receptor 2 OS=Mus musculus OX=10090 GN=Ifnar2 PE=1 SV=2	6.43275	56.543	94.2	99.1	0.950555	-0.073158	0.932792	down
Nop2	Probable 28S rRNA (cytosine-C(5))-methyltransferase OS=Mus musculus OX=10090 GN=Nop2 PE=1 SV=1	0.882724	86.699	89.6	94.3	0.950159	-0.0737591	0.931351	down
Umod	Uromodulin OS=Mus musculus OX=10090 GN=Umod PE=1 SV=1	14.3302	70.798	97.2	102.3	0.950147	-0.0737774	0.931306	down
Cdh13	Cadherin-13 OS=Mus musculus OX=10090 GN=Cdh13 PE=1 SV=2	11.9048	78.137	94.4	99.45	0.949221	-0.0751841	0.927936	down
Ttr	Transthyretin OS=Mus musculus OX=10090 GN=Ttr PE=1 SV=1	31.2925	15.766	58.3	61.6	0.946429	-0.0794338	0.917762	down
C4bpa	C4b-binding protein OS=Mus musculus OX=10090 GN=C4bpa PE=1 SV=3	30.9168	51.49	96.2	101.65	0.946385	-0.0795009	0.917602	down
Cst3	Cystatin-C OS=Mus musculus OX=10090 GN=Cst3 PE=1 SV=2	30.7143	15.521	95	100.4	0.946215	-0.0797601	0.916983	down
Asl	Argininosuccinate lyase OS=Mus musculus OX=10090 GN=Asl PE=1 SV=1	1.93966	51.707	97.5	103.1	0.945684	-0.0805699	0.915045	down
Spink1	Serine protease inhibitor Kazal-type 1 OS=Mus musculus OX=10090 GN=Spink1 PE=1 SV=1	10	8.482	96.8	102.45	0.944851	-0.0818413	0.912007	down
Pdcd6ip	Programmed cell death 6-interacting protein OS=Mus musculus OX=10090 GN=Pdcd6ip PE=1 SV=3	2.07135	95.964	95.6	101.25	0.944198	-0.0828387	0.90962	down
Icam1	Intercellular adhesion molecule 1 OS=Mus musculus OX=10090 GN=Icam1 PE=1 SV=1	25.8845	58.807	93.9	99.45	0.944193	-0.0828463	0.909604	down
Ube2o	(E3-independent) E2 ubiquitin-conjugating enzyme UBE2O OS=Mus musculus OX=10090 GN=Ube2o PE=1 SV=3	1.1646	140.746	95.2	100.85	0.943976	-0.0831779	0.908812	down
Npepps	Puromycin-sensitive aminopeptidase OS=Mus musculus OX=10090 GN=Npepps PE=1 SV=2	3.26087	103.26	94.8	100.45	0.943753	-0.0835188	0.907997	down
Ptprm	Receptor-type tyrosine-protein phosphatase mu OS=Mus musculus OX=10090 GN=Ptprm PE=1 SV=2	0.550964	163.549	101.2	107.3	0.94315	-0.0844409	0.905794	down
Pnliprp1	Inactive pancreatic lipase-related protein 1 OS=Mus musculus OX=10090 GN=Pnliprp1 PE=1 SV=2	1.69133	52.662	86.2	91.55	0.941562	-0.086872	0.89999	down
Dpp3	Dipeptidyl peptidase 3 OS=Mus musculus OX=10090 GN=Dpp3 PE=1 SV=2	4.47154	82.846	95.5	101.45	0.94135	-0.0871969	0.899216	down
Fgb	Fibrinogen beta chain OS=Mus musculus OX=10090 GN=Fgb PE=1 SV=1	43.4511	54.718	90.9	96.6	0.940994	-0.0877426	0.897912	down
Krt75	Keratin, type II cytoskeletal 75 OS=Mus musculus OX=10090 GN=Krt75 PE=1 SV=1	9.61887	59.704	94.3	100.25	0.940648	-0.0882731	0.896649	down
Apeh	Acylamino-acid-releasing enzyme OS=Mus musculus OX=10090 GN=Apeh PE=1 SV=3	6.28415	81.529	97.7	103.9	0.940327	-0.0887656	0.895474	down
Sumo3	Small ubiquitin-related modifier 3 OS=Mus musculus OX=10090 GN=Sumo3 PE=1 SV=1	10.9091	12.422	96.2	102.35	0.939912	-0.0894024	0.893955	down
Apom	Apolipoprotein M OS=Mus musculus OX=10090 GN=Apom PE=1 SV=1	35.2632	21.259	91.5	97.35	0.939908	-0.0894085	0.893939	down
Reln	Reelin OS=Mus musculus OX=10090 GN=Reln PE=1 SV=3	0.202254	387.246	96	102.15	0.939794	-0.0895835	0.893525	down
Ptpa	Serine/threonine-protein phosphatase 2A activator OS=Mus musculus OX=10090 GN=Ptpa PE=1 SV=1	3.09598	36.687	95.9	102.05	0.939735	-0.0896741	0.893309	down
Mug1	Murinoglobulin-1 OS=Mus musculus OX=10090 GN=Mug1 PE=1 SV=3	57.9268	165.193	96.9	103.15	0.939409	-0.0901747	0.892113	down
Ube2k	Ubiquitin-conjugating enzyme E2 K OS=Mus musculus OX=10090 GN=Ube2k PE=1 SV=3	6	22.393	95.9	102.1	0.939275	-0.0903805	0.891624	down
Fcn1	Ficolin-1 OS=Mus musculus OX=10090 GN=Fcn1 PE=1 SV=1	25.4491	36.275	94.1	100.25	0.938653	-0.0913362	0.889348	down
Itih3	Inter-alpha-trypsin inhibitor heavy chain H3 OS=Mus musculus OX=10090 GN=Itih3 PE=1 SV=3	30.3712	99.296	97.7	104.15	0.93807	-0.0922325	0.887212	down
Icoslg	ICOS ligand OS=Mus musculus OX=10090 GN=Icoslg PE=1 SV=1	3.41615	35.937	93.1	99.25	0.938035	-0.0922863	0.887085	down
Itgb1	Integrin beta-1 OS=Mus musculus OX=10090 GN=Itgb1 PE=1 SV=1	7.01754	88.173	93.6	99.85	0.937406	-0.0932541	0.884781	down
Eif4a2	Eukaryotic initiation factor 4A-II OS=Mus musculus OX=10090 GN=Eif4a2 PE=1 SV=2	3.4398	46.373	97.8	104.4	0.936782	-0.0942147	0.882493	down
Ahsg	Alpha-2-HS-glycoprotein OS=Mus musculus OX=10090 GN=Ahsg PE=1 SV=1	55.0725	37.302	96.8	103.35	0.936623	-0.0944596	0.881912	down
Bpifa2	BPI fold-containing family A member 2 OS=Mus musculus OX=10090 GN=Bpifa2 PE=1 SV=1	18.7234	24.738	89.9	96.05	0.935971	-0.0954643	0.879522	down
Il18bp	Interleukin-18-binding protein OS=Mus musculus OX=10090 GN=Il18bp PE=1 SV=2	12.4352	21.244	94.2	100.7	0.935452	-0.0962645	0.877619	down
Hspa4	Heat shock 70 kDa protein 4 OS=Mus musculus OX=10090 GN=Hspa4 PE=1 SV=1	18.9061	94.073	95.4	102	0.935294	-0.0965082	0.877041	down
Arpc1b	Actin-related protein 2/3 complex subunit 1B OS=Mus musculus OX=10090 GN=Arpc1b PE=1 SV=4	2.15054	41.037	91.4	97.75	0.935038	-0.0969031	0.876104	down
Pitpna	Phosphatidylinositol transfer protein alpha isoform OS=Mus musculus OX=10090 GN=Pitpna PE=1 SV=2	8.48708	31.873	90.3	96.65	0.934299	-0.0980438	0.873392	down
Ltbp1	Latent-transforming growth factor beta-binding protein 1 OS=Mus musculus OX=10090 GN=Ltbp1 PE=1 SV=2	2.21963	186.593	93.5	100.15	0.9336	-0.0991235	0.870827	down
Egfr	Epidermal growth factor receptor OS=Mus musculus OX=10090 GN=Egfr PE=1 SV=1	27.8512	134.766	96.5	103.4	0.933269	-0.0996351	0.869614	down
Met	Hepatocyte growth factor receptor OS=Mus musculus OX=10090 GN=Met PE=1 SV=1	0.507614	153.451	92.3	98.9	0.933266	-0.0996398	0.869603	down
Xdh	Xanthine dehydrogenase/oxidase OS=Mus musculus OX=10090 GN=Xdh PE=1 SV=5	7.19101	146.468	92.2	98.85	0.932726	-0.100475	0.867624	down
Ddt	D-dopachrome decarboxylase OS=Mus musculus OX=10090 GN=Ddt PE=1 SV=3	9.32203	13.069	100.5	107.85	0.93185	-0.10183	0.864407	down
C5	Complement C5 OS=Mus musculus OX=10090 GN=C5 PE=1 SV=2	49.7024	188.759	97.4	104.6	0.931166	-0.10289	0.861899	down
Timp2	Metalloproteinase inhibitor 2 OS=Mus musculus OX=10090 GN=Timp2 PE=1 SV=2	24.0909	24.312	95.3	102.35	0.931119	-0.102963	0.861724	down
Adgrf5	Adhesion G protein-coupled receptor F5 OS=Mus musculus OX=10090 GN=Adgrf5 PE=1 SV=1	6.45401	149.291	95.3	102.35	0.931119	-0.102963	0.861724	down
Retnlg	Resistin-like gamma OS=Mus musculus OX=10090 GN=Retnlg PE=1 SV=1	7.69231	12.526	100.4	107.9	0.930491	-0.103936	0.859421	down
Serpina1e	Alpha-1-antitrypsin 1-5 OS=Mus musculus OX=10090 GN=Serpina1e PE=1 SV=1	44.7942	45.862	108.5	116.7	0.929734	-0.10511	0.856642	down
Ncam1	Neural cell adhesion molecule 1 OS=Mus musculus OX=10090 GN=Ncam1 PE=1 SV=3	14.9776	119.353	96.4	103.75	0.929157	-0.106006	0.85452	down
H2-Q10	H-2 class I histocompatibility antigen, Q10 alpha chain OS=Mus musculus OX=10090 GN=H2-Q10 PE=1 SV=3	45.2308	37.227	90.2	97.1	0.928939	-0.106344	0.853722	down
F2	Prothrombin OS=Mus musculus OX=10090 GN=F2 PE=1 SV=1	51.9417	70.224	93.3	100.45	0.92882	-0.106529	0.853285	down
Gda	Guanine deaminase OS=Mus musculus OX=10090 GN=Gda PE=1 SV=1	22.0264	50.981	93.3	100.45	0.92882	-0.106529	0.853285	down
Gart	Trifunctional purine biosynthetic protein adenosine-3 OS=Mus musculus OX=10090 GN=Gart PE=1 SV=3	1.38614	107.436	89.2	96.2	0.927235	-0.108993	0.847462	down
Gclc	Glutamate--cysteine ligase catalytic subunit OS=Mus musculus OX=10090 GN=Gclc PE=1 SV=4	1.72684	72.525	93	100.35	0.926756	-0.109739	0.845704	down
Gnpda1	Glucosamine-6-phosphate isomerase 1 OS=Mus musculus OX=10090 GN=Gnpda1 PE=1 SV=3	4.15225	32.528	96.2	103.9	0.92589	-0.111087	0.842522	down
Csf1r	Macrophage colony-stimulating factor 1 receptor OS=Mus musculus OX=10090 GN=Csf1r PE=1 SV=3	17.0931	109.11	94.1	101.65	0.925726	-0.111343	0.841916	down
Pon1	Serum paraoxonase/arylesterase 1 OS=Mus musculus OX=10090 GN=Pon1 PE=1 SV=2	55.7746	39.54	83.4	90.15	0.925125	-0.11228	0.839709	down
Il1r2	Interleukin-1 receptor type 2 OS=Mus musculus OX=10090 GN=Il1r2 PE=1 SV=1	16.3415	45.616	94.9	102.6	0.924951	-0.112551	0.839071	down
Serpina3b	Serine protease inhibitor A3B OS=Mus musculus OX=10090 GN=Serpina3b PE=2 SV=1	2.85714	47.384	94.5	102.25	0.924205	-0.113715	0.83633	down
Il2rg	Cytokine receptor common subunit gamma OS=Mus musculus OX=10090 GN=Il2rg PE=2 SV=1	12.4661	42.214	95	102.8	0.924125	-0.11384	0.836033	down
Idh1	Isocitrate dehydrogenase [NADP] cytoplasmic OS=Mus musculus OX=10090 GN=Idh1 PE=1 SV=2	8.69565	46.644	95.4	103.25	0.923971	-0.114081	0.835468	down
Pgd	6-phosphogluconate dehydrogenase, decarboxylating OS=Mus musculus OX=10090 GN=Pgd PE=1 SV=3	7.24638	53.213	93.8	101.55	0.923683	-0.11453	0.83441	down
Adsl	Adenylosuccinate lyase OS=Mus musculus OX=10090 GN=Adsl PE=1 SV=2	5.57851	54.831	94.1	101.9	0.923454	-0.114888	0.833569	down
Heg1	Protein HEG homolog 1 OS=Mus musculus OX=10090 GN=Heg1 PE=1 SV=1	0.897532	141.811	93.1	101	0.921782	-0.117502	0.827423	down
Psmb7	Proteasome subunit beta type-7 OS=Mus musculus OX=10090 GN=Psmb7 PE=1 SV=1	17.6895	29.872	90.5	98.2	0.921589	-0.117805	0.826711	down
Snca	Alpha-synuclein OS=Mus musculus OX=10090 GN=Snca PE=1 SV=2	6.42857	14.476	98.8	107.25	0.921212	-0.118395	0.825327	down
Pnp	Purine nucleoside phosphorylase OS=Mus musculus OX=10090 GN=Pnp PE=1 SV=2	11.7647	32.256	95.1	103.25	0.921065	-0.118625	0.824788	down
Lap3	Cytosol aminopeptidase OS=Mus musculus OX=10090 GN=Lap3 PE=1 SV=3	23.3141	56.106	92.6	100.55	0.920935	-0.118829	0.824308	down
Mylk	Myosin light chain kinase, smooth muscle OS=Mus musculus OX=10090 GN=Mylk PE=1 SV=3	1.23648	212.792	93.5	101.6	0.920276	-0.119861	0.821884	down
Ptprf	Receptor-type tyrosine-protein phosphatase F OS=Mus musculus OX=10090 GN=Ptprf PE=1 SV=1	1.52792	211.356	93.5	101.7	0.919371	-0.121281	0.818558	down
Blmh	Bleomycin hydrolase OS=Mus musculus OX=10090 GN=Blmh PE=1 SV=1	18.9011	52.477	91.9	100.2	0.917166	-0.124745	0.810452	down
Clec3b	Tetranectin OS=Mus musculus OX=10090 GN=Clec3b PE=1 SV=2	38.1188	22.243	94.2	102.8	0.916342	-0.126042	0.807425	down
Cfi	Complement factor I OS=Mus musculus OX=10090 GN=Cfi PE=1 SV=3	53.5655	67.217	94.5	103.25	0.915254	-0.127756	0.803425	down
Klk1b24	Kallikrein 1-related peptidase b24 OS=Mus musculus OX=10090 GN=Klk1b24 PE=2 SV=3	5.70342	28.908	86.6	94.75	0.913984	-0.129759	0.798757	down
Hba	Hemoglobin subunit alpha OS=Mus musculus OX=10090 GN=Hba PE=1 SV=2	69.0141	15.076	96.4	105.5	0.913744	-0.130138	0.797875	down
Vcp	Transitional endoplasmic reticulum ATPase OS=Mus musculus OX=10090 GN=Vcp PE=1 SV=4	13.0273	89.266	93.2	102.1	0.912831	-0.13158	0.794518	down
Emilin1	EMILIN-1 OS=Mus musculus OX=10090 GN=Emilin1 PE=1 SV=1	2.26155	107.518	92	100.8	0.912698	-0.131791	0.794032	down
Sbsn	Suprabasin OS=Mus musculus OX=10090 GN=Sbsn PE=2 SV=1	18	72.29	95.3	104.5	0.911962	-0.132954	0.791326	down
H2-Q8	H-2 class I histocompatibility antigen, Q8 alpha chain OS=Mus musculus OX=10090 GN=H2-Q8 PE=3 SV=1	15.9509	37.387	90.4	99.25	0.910831	-0.134745	0.787172	down
Pebp1	Phosphatidylethanolamine-binding protein 1 OS=Mus musculus OX=10090 GN=Pebp1 PE=1 SV=3	43.8503	20.817	93.9	103.1	0.910766	-0.134848	0.786934	down
Hspa5	Endoplasmic reticulum chaperone BiP OS=Mus musculus OX=10090 GN=Hspa5 PE=1 SV=3	41.374	72.377	93.7	102.9	0.910593	-0.135122	0.786297	down
Ppic	Peptidyl-prolyl cis-trans isomerase C OS=Mus musculus OX=10090 GN=Ppic PE=1 SV=1	29.2453	22.78	94.7	104.05	0.910139	-0.135841	0.784631	down
Psmb2	Proteasome subunit beta type-2 OS=Mus musculus OX=10090 GN=Psmb2 PE=1 SV=1	13.4328	22.892	88.5	97.35	0.909091	-0.137503	0.780781	down
Blvrb	Flavin reductase (NADPH) OS=Mus musculus OX=10090 GN=Blvrb PE=1 SV=3	34.466	22.183	95.1	104.65	0.908743	-0.138056	0.779505	down
C1qb	Complement C1q subcomponent subunit B OS=Mus musculus OX=10090 GN=C1qb PE=1 SV=2	5.5336	26.701	94.9	104.45	0.908569	-0.138332	0.778863	down
Ube2l6	Ubiquitin/ISG15-conjugating enzyme E2 L6 OS=Mus musculus OX=10090 GN=Ube2l6 PE=1 SV=3	4.57516	17.829	92.5	101.9	0.907753	-0.139628	0.775868	down
A2m	Alpha-2-macroglobulin-P OS=Mus musculus OX=10090 GN=A2m PE=2 SV=2	11.1262	164.248	93.5	103.4	0.904255	-0.145198	0.763036	down
Gm94	Uncharacterized protein C5orf46 homolog OS=Mus musculus OX=10090 GN=Gm94 PE=3 SV=1	26.8817	10.032	91.9	101.65	0.904083	-0.145473	0.762403	down
Nop53	Ribosome biogenesis protein NOP53 OS=Mus musculus OX=10090 GN=Nop53 PE=1 SV=1	2.06612	55.759	94.2	104.25	0.903597	-0.146249	0.760623	down
Calu	Calumenin OS=Mus musculus OX=10090 GN=Calu PE=1 SV=1	3.80952	37.041	94.3	104.75	0.900239	-0.15162	0.748319	down
Psap	Prosaposin OS=Mus musculus OX=10090 GN=Psap PE=1 SV=2	39.1382	61.381	92.1	102.35	0.899853	-0.152239	0.746909	down
Dnpep	Aspartyl aminopeptidase OS=Mus musculus OX=10090 GN=Dnpep PE=1 SV=2	3.8055	52.174	90.7	100.85	0.899355	-0.153037	0.745086	down
Psma4	Proteasome subunit alpha type-4 OS=Mus musculus OX=10090 GN=Psma4 PE=1 SV=1	42.9119	29.452	89.3	99.35	0.898842	-0.153861	0.743209	down
Tubb5	Tubulin beta-5 chain OS=Mus musculus OX=10090 GN=Tubb5 PE=1 SV=1	20.7207	49.639	95.5	106.25	0.898823	-0.153891	0.743139	down
Psmb3	Proteasome subunit beta type-3 OS=Mus musculus OX=10090 GN=Psmb3 PE=1 SV=1	30.7317	22.949	90	100.15	0.898652	-0.154166	0.742512	down
Hist1h1a	Histone H1.1 OS=Mus musculus OX=10090 GN=Hist1h1a PE=1 SV=2	3.28638	21.772	95.4	106.25	0.897882	-0.155402	0.739697	down
Mthfd1	C-1-tetrahydrofolate synthase, cytoplasmic OS=Mus musculus OX=10090 GN=Mthfd1 PE=1 SV=4	0.855615	101.136	93.5	104.15	0.897744	-0.155624	0.739189	down
Pygl	Glycogen phosphorylase, liver form OS=Mus musculus OX=10090 GN=Pygl PE=1 SV=4	3.41176	97.401	92.1	102.6	0.897661	-0.155757	0.738886	down
Ckb	Creatine kinase B-type OS=Mus musculus OX=10090 GN=Ckb PE=1 SV=1	15.4856	42.686	93.2	103.9	0.897016	-0.156794	0.73653	down
Glycam1	Glycosylation-dependent cell adhesion molecule 1 OS=Mus musculus OX=10090 GN=Glycam1 PE=1 SV=1	11.9205	16.199	88.9	99.25	0.895718	-0.158883	0.731785	down
Hsp90b1	Endoplasmin OS=Mus musculus OX=10090 GN=Hsp90b1 PE=1 SV=2	11.0973	92.418	91.7	102.4	0.895508	-0.159222	0.731018	down
F11	Coagulation factor XI OS=Mus musculus OX=10090 GN=F11 PE=2 SV=2	11.5385	69.743	96.6	107.9	0.895273	-0.1596	0.730162	down
Efemp1	EGF-containing fibulin-like extracellular matrix protein 1 OS=Mus musculus OX=10090 GN=Efemp1 PE=1 SV=1	26.1663	54.916	91.7	102.5	0.894634	-0.160631	0.727828	down
Psmb8	Proteasome subunit beta type-8 OS=Mus musculus OX=10090 GN=Psmb8 PE=1 SV=2	18.8406	30.241	88.4	98.95	0.893381	-0.162653	0.723253	down
Ddx25	ATP-dependent RNA helicase DDX25 OS=Mus musculus OX=10090 GN=Ddx25 PE=1 SV=2	3.5124	54.841	94.9	106.35	0.892337	-0.164339	0.719446	down
Hagh	Hydroxyacylglutathione hydrolase, mitochondrial OS=Mus musculus OX=10090 GN=Hagh PE=1 SV=2	2.26537	34.062	91.8	102.95	0.891695	-0.165378	0.717107	down
C4b	Complement C4-B OS=Mus musculus OX=10090 GN=C4b PE=1 SV=3	51.9563	192.794	92.8	104.1	0.891451	-0.165773	0.716216	down
Ppp2r1a	Serine/threonine-protein phosphatase 2A 65 kDa regulatory subunit A alpha isoform OS=Mus musculus OX=10090 GN=Ppp2r1a PE=1 SV=3	5.60272	65.281	87.7	98.4	0.89126	-0.166082	0.715522	down
Hpx	Hemopexin OS=Mus musculus OX=10090 GN=Hpx PE=1 SV=2	56.5217	51.285	96.5	108.3	0.891043	-0.166433	0.714733	down
Frmpd1	FERM and PDZ domain-containing protein 1 OS=Mus musculus OX=10090 GN=Frmpd1 PE=1 SV=1	0.451904	169.102	91.5	102.7	0.890944	-0.166593	0.714373	down
Rnh1	Ribonuclease inhibitor OS=Mus musculus OX=10090 GN=Rnh1 PE=1 SV=1	2.19298	49.784	91	102.15	0.890847	-0.16675	0.714017	down
Dmkn	Dermokine OS=Mus musculus OX=10090 GN=Dmkn PE=2 SV=2	2.12766	51.63	97	108.95	0.890317	-0.167609	0.712086	down
Psma6	Proteasome subunit alpha type-6 OS=Mus musculus OX=10090 GN=Psma6 PE=1 SV=1	45.122	27.355	89.5	100.55	0.890104	-0.167954	0.711314	down
Spp2	Secreted phosphoprotein 24 OS=Mus musculus OX=10090 GN=Spp2 PE=1 SV=2	23.6453	23.121	89.2	100.3	0.889332	-0.169206	0.708502	down
Pmel	Melanocyte protein PMEL OS=Mus musculus OX=10090 GN=Pmel PE=1 SV=1	1.4377	65.938	93.5	105.15	0.889206	-0.16941	0.708044	down
Fgl2	Fibroleukin OS=Mus musculus OX=10090 GN=Fgl2 PE=1 SV=1	2.31481	48.92	92.6	104.15	0.889102	-0.169579	0.707667	down
Msn	Moesin OS=Mus musculus OX=10090 GN=Msn PE=1 SV=3	23.7435	67.725	91.2	102.65	0.888456	-0.170628	0.705316	down
Igfbp4	Insulin-like growth factor-binding protein 4 OS=Mus musculus OX=10090 GN=Igfbp4 PE=1 SV=2	27.1654	27.788	93.5	105.25	0.888361	-0.170782	0.704971	down
Tpm2	Tropomyosin beta chain OS=Mus musculus OX=10090 GN=Tpm2 PE=1 SV=1	20.7746	32.817	93.3	105.05	0.888148	-0.171128	0.704198	down
Igf2r	Cation-independent mannose-6-phosphate receptor OS=Mus musculus OX=10090 GN=Igf2r PE=1 SV=1	0.644382	273.639	95.8	107.9	0.887859	-0.171598	0.703146	down
Prg4	Proteoglycan 4 OS=Mus musculus OX=10090 GN=Prg4 PE=1 SV=2	5.78748	115.924	91.2	102.8	0.88716	-0.172734	0.700604	down
Pcdh12	Protocadherin-12 OS=Mus musculus OX=10090 GN=Pcdh12 PE=1 SV=2	1.27119	128.594	92.4	104.35	0.885482	-0.175465	0.694513	down
Fgg	Fibrinogen gamma chain OS=Mus musculus OX=10090 GN=Fgg PE=1 SV=1	34.633	49.36	87.4	98.75	0.885063	-0.176148	0.692996	down
Krt14	Keratin, type I cytoskeletal 14 OS=Mus musculus OX=10090 GN=Krt14 PE=1 SV=2	9.29752	52.834	90.4	102.6	0.881092	-0.182635	0.678616	down
Fn1	Fibronectin OS=Mus musculus OX=10090 GN=Fn1 PE=1 SV=4	54.784	272.368	92.3	104.8	0.880725	-0.183236	0.677292	down
Cfp	Properdin OS=Mus musculus OX=10090 GN=Cfp PE=2 SV=2	32.5431	50.293	90.5	102.8	0.88035	-0.183851	0.675937	down
Serpinf2	Alpha-2-antiplasmin OS=Mus musculus OX=10090 GN=Serpinf2 PE=1 SV=1	29.3279	54.937	91.5	104	0.879808	-0.184739	0.673978	down
Sparc	SPARC OS=Mus musculus OX=10090 GN=Sparc PE=1 SV=1	4.30464	34.428	92.1	105	0.877143	-0.189116	0.66437	down
Apod	Apolipoprotein D OS=Mus musculus OX=10090 GN=Apod PE=1 SV=1	41.7989	21.516	83.3	95.05	0.876381	-0.19037	0.661628	down
Lifr	Leukemia inhibitory factor receptor OS=Mus musculus OX=10090 GN=Lifr PE=1 SV=1	26.3736	122.497	94.2	107.6	0.875465	-0.191879	0.658333	down
Psma3	Proteasome subunit alpha type-3 OS=Mus musculus OX=10090 GN=Psma3 PE=1 SV=3	29.8039	28.387	89.8	102.7	0.874391	-0.19365	0.654478	down
Creb3l3	Cyclic AMP-responsive element-binding protein 3-like protein 3 OS=Mus musculus OX=10090 GN=Creb3l3 PE=2 SV=1	5.42797	52.113	87.1	99.65	0.874059	-0.194197	0.653285	down
Reg3g	Regenerating islet-derived protein 3-gamma OS=Mus musculus OX=10090 GN=Reg3g PE=1 SV=1	21.2644	19.294	81.4	93.45	0.871054	-0.199166	0.642518	down
Pf4	Platelet factor 4 OS=Mus musculus OX=10090 GN=Pf4 PE=1 SV=1	28.5714	11.236	93.7	107.6	0.870818	-0.199557	0.641673	down
Treml1	Trem-like transcript 1 protein OS=Mus musculus OX=10090 GN=Treml1 PE=1 SV=2	14.511	33.501	92.6	106.4	0.870301	-0.200414	0.639825	down
Dspp	Dentin sialophosphoprotein OS=Mus musculus OX=10090 GN=Dspp PE=1 SV=2	5.35332	93.85	87.7	100.95	0.868747	-0.202992	0.634277	down
Igkc	Immunoglobulin kappa constant OS=Mus musculus OX=10090 GN=Igkc PE=1 SV=2	7.47664	11.927	90.8	104.6	0.868069	-0.204118	0.631859	down
Vcam1	Vascular cell adhesion protein 1 OS=Mus musculus OX=10090 GN=Vcam1 PE=1 SV=1	31.2585	81.265	89	102.6	0.867446	-0.205154	0.629642	down
Tmod3	Tropomodulin-3 OS=Mus musculus OX=10090 GN=Tmod3 PE=1 SV=1	3.97727	39.478	91.6	105.6	0.867424	-0.205191	0.629563	down
Akr1b1	Aldose reductase OS=Mus musculus OX=10090 GN=Akr1b1 PE=1 SV=3	8.22785	35.709	89.3	102.95	0.867411	-0.205212	0.629517	down
Gclm	Glutamate--cysteine ligase regulatory subunit OS=Mus musculus OX=10090 GN=Gclm PE=1 SV=1	8.0292	30.516	91.3	105.7	0.863765	-0.211289	0.616564	down
Alox12	Arachidonate 12-lipoxygenase, 12S-type OS=Mus musculus OX=10090 GN=Alox12 PE=1 SV=4	11.463	75.341	90.2	104.45	0.863571	-0.211613	0.615876	down
Ovgp1	Oviduct-specific glycoprotein OS=Mus musculus OX=10090 GN=Ovgp1 PE=2 SV=1	0.970874	78.758	91.4	105.95	0.862671	-0.213118	0.612689	down
Psma7	Proteasome subunit alpha type-7 OS=Mus musculus OX=10090 GN=Psma7 PE=1 SV=1	34.2742	27.838	88.7	102.9	0.862002	-0.214237	0.610322	down
Psmb10	Proteasome subunit beta type-10 OS=Mus musculus OX=10090 GN=Psmb10 PE=1 SV=1	17.5824	29.045	87.3	101.4	0.860947	-0.216004	0.606595	down
Rab1A	Ras-related protein Rab-1A OS=Mus musculus OX=10090 GN=Rab1A PE=1 SV=3	33.6585	22.663	90.6	105.25	0.860808	-0.216237	0.606104	down
Tpi1	Triosephosphate isomerase OS=Mus musculus OX=10090 GN=Tpi1 PE=1 SV=4	45.4849	32.171	91.2	106.05	0.859972	-0.217638	0.603155	down
Igfbp6	Insulin-like growth factor-binding protein 6 OS=Mus musculus OX=10090 GN=Igfbp6 PE=2 SV=2	3.36134	25.33	88.6	103.1	0.85936	-0.218665	0.601	down
Prkcd	Protein kinase C delta type OS=Mus musculus OX=10090 GN=Prkcd PE=1 SV=3	1.03858	77.497	85	99	0.858586	-0.219965	0.598275	down
Ca3	Carbonic anhydrase 3 OS=Mus musculus OX=10090 GN=Ca3 PE=1 SV=3	5.38462	29.348	84.6	98.65	0.857577	-0.221662	0.59473	down
Aldoa	Fructose-bisphosphate aldolase A OS=Mus musculus OX=10090 GN=Aldoa PE=1 SV=2	52.7473	39.331	90.1	105.2	0.856464	-0.223535	0.590823	down
Serpine2	Glia-derived nexin OS=Mus musculus OX=10090 GN=Serpine2 PE=1 SV=2	40.806	44.179	89	104.05	0.855358	-0.2254	0.586949	down
Fga	Fibrinogen alpha chain OS=Mus musculus OX=10090 GN=Fga PE=1 SV=1	27.8834	87.375	89	104.15	0.854537	-0.226785	0.584076	down
Col3a1	Collagen alpha-1(III) chain OS=Mus musculus OX=10090 GN=Col3a1 PE=1 SV=4	5.12295	138.858	92.6	108.4	0.854244	-0.22728	0.583051	down
Tpm1	Tropomyosin alpha-1 chain OS=Mus musculus OX=10090 GN=Tpm1 PE=1 SV=1	30.9859	32.661	89.7	105.1	0.853473	-0.228583	0.58036	down
Antxr1	Anthrax toxin receptor 1 OS=Mus musculus OX=10090 GN=Antxr1 PE=1 SV=2	2.13523	62.269	87.4	102.55	0.852267	-0.230623	0.576157	down
Thop1	Thimet oligopeptidase OS=Mus musculus OX=10090 GN=Thop1 PE=1 SV=1	4.51237	77.976	91.1	107	0.851402	-0.232088	0.573146	down
Ache	Acetylcholinesterase OS=Mus musculus OX=10090 GN=Ache PE=1 SV=1	1.4658	68.125	93.9	110.35	0.850929	-0.232889	0.571502	down
Icam2	Intercellular adhesion molecule 2 OS=Mus musculus OX=10090 GN=Icam2 PE=1 SV=1	3.61011	31.37	94.6	111.3	0.849955	-0.234542	0.568121	down
Igfbp2	Insulin-like growth factor-binding protein 2 OS=Mus musculus OX=10090 GN=Igfbp2 PE=2 SV=2	9.18033	32.825	91.9	108.25	0.848961	-0.23623	0.564675	down
Pgk1	Phosphoglycerate kinase 1 OS=Mus musculus OX=10090 GN=Pgk1 PE=1 SV=4	37.4101	44.522	90	106.2	0.847458	-0.238786	0.559477	down
Hexa	Beta-hexosaminidase subunit alpha OS=Mus musculus OX=10090 GN=Hexa PE=1 SV=2	3.40909	60.574	88.9	105	0.846667	-0.240133	0.556748	down
Tubb2a	Tubulin beta-2A chain OS=Mus musculus OX=10090 GN=Tubb2a PE=1 SV=1	18.6517	49.875	86.9	102.65	0.846566	-0.240306	0.5564	down
Ctss	Cathepsin S OS=Mus musculus OX=10090 GN=Ctss PE=1 SV=2	15	38.449	86.8	102.55	0.846416	-0.240561	0.555885	down
Sema4b	Semaphorin-4B OS=Mus musculus OX=10090 GN=Sema4b PE=1 SV=2	1.21507	91.335	87.2	103.15	0.845371	-0.242343	0.552284	down
Ranbp1	Ran-specific GTPase-activating protein OS=Mus musculus OX=10090 GN=Ranbp1 PE=1 SV=2	5.41872	23.582	91.5	108.35	0.844485	-0.243856	0.549241	down
G6pdx	Glucose-6-phosphate 1-dehydrogenase X OS=Mus musculus OX=10090 GN=G6pdx PE=1 SV=3	3.1068	59.225	89	105.45	0.844002	-0.244682	0.547581	down
Csf1	Macrophage colony-stimulating factor 1 OS=Mus musculus OX=10090 GN=Csf1 PE=1 SV=2	4.16667	60.611	88.6	105	0.84381	-0.24501	0.546921	down
Ap1b1	AP-1 complex subunit beta-1 OS=Mus musculus OX=10090 GN=Ap1b1 PE=1 SV=2	1.16649	103.869	91.5	108.45	0.843707	-0.245186	0.546569	down
Mup1	Major urinary protein 1 OS=Mus musculus OX=10090 GN=Mup1 PE=1 SV=1	76.1111	20.635	105.9	125.75	0.842147	-0.247856	0.541228	down
Mmrn1	Multimerin-1 OS=Mus musculus OX=10090 GN=Mmrn1 PE=1 SV=2	4.21488	136.02	89	105.7	0.842006	-0.248098	0.540745	down
Hint1	Histidine triad nucleotide-binding protein 1 OS=Mus musculus OX=10090 GN=Hint1 PE=1 SV=3	6.34921	13.768	90.4	107.55	0.840539	-0.250613	0.53574	down
Cndp2	Cytosolic non-specific dipeptidase OS=Mus musculus OX=10090 GN=Cndp2 PE=1 SV=1	2.52632	52.734	88.8	105.8	0.839319	-0.252709	0.531588	down
Kpnb1	Importin subunit beta-1 OS=Mus musculus OX=10090 GN=Kpnb1 PE=1 SV=2	2.39726	97.122	87.9	104.75	0.839141	-0.253015	0.530981	down
Ngp	Neutrophilic granule protein OS=Mus musculus OX=10090 GN=Ngp PE=1 SV=1	5.38922	19.32	92.5	110.45	0.837483	-0.255868	0.525357	down
S100a8	Protein S100-A8 OS=Mus musculus OX=10090 GN=S100a8 PE=1 SV=3	22.4719	10.288	91.9	109.75	0.837358	-0.256084	0.524932	down
Pepd	Xaa-Pro dipeptidase OS=Mus musculus OX=10090 GN=Pepd PE=1 SV=3	8.51927	54.993	86.3	103.15	0.836646	-0.257311	0.522524	down
Hsp90aa1	Heat shock protein HSP 90-alpha OS=Mus musculus OX=10090 GN=Hsp90aa1 PE=1 SV=4	13.3697	84.735	89.5	107.1	0.835668	-0.258998	0.519221	down
C1qa	Complement C1q subcomponent subunit A OS=Mus musculus OX=10090 GN=C1qa PE=1 SV=2	5.71429	25.958	89.1	106.65	0.835443	-0.259387	0.518463	down
Cct5	T-complex protein 1 subunit epsilon OS=Mus musculus OX=10090 GN=Cct5 PE=1 SV=1	1.47874	59.586	87.5	104.75	0.835322	-0.259596	0.518056	down
Serpinb2	Plasminogen activator inhibitor 2, macrophage OS=Mus musculus OX=10090 GN=Serpinb2 PE=1 SV=1	3.61446	46.262	88.4	106.05	0.833569	-0.262626	0.512157	down
Actr2	Actin-related protein 2 OS=Mus musculus OX=10090 GN=Actr2 PE=1 SV=1	1.77665	44.732	89.4	107.35	0.83279	-0.263975	0.509543	down
Eef2	Elongation factor 2 OS=Mus musculus OX=10090 GN=Eef2 PE=1 SV=2	4.4289	95.253	88.9	106.9	0.831618	-0.266007	0.505621	down
Mup2	Major urinary protein 2 OS=Mus musculus OX=10090 GN=Mup2 PE=1 SV=1	74.4444	20.65	94.9	114.15	0.831362	-0.266451	0.504765	down
Aldh9a1	4-trimethylaminobutyraldehyde dehydrogenase OS=Mus musculus OX=10090 GN=Aldh9a1 PE=1 SV=1	2.42915	53.48	85.9	103.5	0.829952	-0.2689	0.50006	down
Itm2b	Integral membrane protein 2B OS=Mus musculus OX=10090 GN=Itm2b PE=1 SV=1	3.38346	30.24	90.1	108.8	0.828125	-0.27208	0.493989	down
Ube2l3	Ubiquitin-conjugating enzyme E2 L3 OS=Mus musculus OX=10090 GN=Ube2l3 PE=1 SV=1	34.4156	17.85	87.9	106.3	0.826905	-0.274207	0.489949	down
Actn1	Alpha-actinin-1 OS=Mus musculus OX=10090 GN=Actn1 PE=1 SV=1	26.009	103.004	89.2	107.95	0.826308	-0.275248	0.487978	down
Lyn	Tyrosine-protein kinase Lyn OS=Mus musculus OX=10090 GN=Lyn PE=1 SV=4	2.34375	58.775	89.7	108.6	0.825967	-0.275844	0.48685	down
Arpc5	Actin-related protein 2/3 complex subunit 5 OS=Mus musculus OX=10090 GN=Arpc5 PE=1 SV=3	21.8543	16.278	87.5	106	0.825472	-0.276709	0.485218	down
Isg15	Ubiquitin-like protein ISG15 OS=Mus musculus OX=10090 GN=Isg15 PE=1 SV=4	11.1801	17.886	85.5	103.6	0.82529	-0.277027	0.484618	down
B2m	Beta-2-microglobulin OS=Mus musculus OX=10090 GN=B2m PE=1 SV=2	48.7395	13.77	85.5	103.75	0.824096	-0.279116	0.480694	down
Cmpk1	UMP-CMP kinase OS=Mus musculus OX=10090 GN=Cmpk1 PE=1 SV=1	16.3265	22.151	78.9	96	0.821875	-0.283009	0.47342	down
Pgls	6-phosphogluconolactonase OS=Mus musculus OX=10090 GN=Pgls PE=1 SV=1	8.56031	27.237	88.3	107.5	0.821395	-0.283852	0.471855	down
Pdia3	Protein disulfide-isomerase A3 OS=Mus musculus OX=10090 GN=Pdia3 PE=1 SV=2	27.7228	56.643	88.8	108.4	0.819188	-0.287734	0.464678	down
Thbs1	Thrombospondin-1 OS=Mus musculus OX=10090 GN=Thbs1 PE=1 SV=1	45.0427	129.564	88	107.55	0.818224	-0.289432	0.461556	down
Arhgef33	Rho guanine nucleotide exchange factor 33 OS=Mus musculus OX=10090 GN=Arhgef33 PE=1 SV=3	2.23529	94.698	88.7	108.55	0.817135	-0.291354	0.458039	down
Myh9	Myosin-9 OS=Mus musculus OX=10090 GN=Myh9 PE=1 SV=4	10.9184	226.232	89.9	110.05	0.816901	-0.291767	0.457286	down
Creld2	Cysteine-rich with EGF-like domain protein 2 OS=Mus musculus OX=10090 GN=Creld2 PE=1 SV=1	2.28571	38.194	89.4	109.9	0.813467	-0.297844	0.446271	down
Pdlim5	PDZ and LIM domain protein 5 OS=Mus musculus OX=10090 GN=Pdlim5 PE=1 SV=4	2.03046	63.259	85.8	105.65	0.812115	-0.300244	0.441966	down
Cir1	Corepressor interacting with RBPJ 1 OS=Mus musculus OX=10090 GN=Cir1 PE=1 SV=2	2	51.806	81.6	100.6	0.811133	-0.30199	0.438848	down
Txndc5	Thioredoxin domain-containing protein 5 OS=Mus musculus OX=10090 GN=Txndc5 PE=1 SV=2	3.35731	46.386	82.4	101.65	0.810625	-0.302893	0.437237	down
Mstn	Growth/differentiation factor 8 OS=Mus musculus OX=10090 GN=Mstn PE=1 SV=1	14.6277	42.893	87.5	108.1	0.809436	-0.305011	0.433479	down
P4hb	Protein disulfide-isomerase OS=Mus musculus OX=10090 GN=P4hb PE=1 SV=2	10.2161	57.023	87.1	107.85	0.807603	-0.308282	0.427714	down
Gapdh	Glyceraldehyde-3-phosphate dehydrogenase OS=Mus musculus OX=10090 GN=Gapdh PE=1 SV=2	33.3333	35.787	87.3	108.1	0.807586	-0.308312	0.427659	down
Acp1	Low molecular weight phosphotyrosine protein phosphatase OS=Mus musculus OX=10090 GN=Acp1 PE=1 SV=3	6.96203	18.18	85.2	105.65	0.806436	-0.310368	0.42406	down
Ptges3	Prostaglandin E synthase 3 OS=Mus musculus OX=10090 GN=Ptges3 PE=1 SV=1	8.125	18.709	84.5	104.9	0.805529	-0.311992	0.421228	down
Nt5c3a	Cytosolic 5'-nucleotidase 3A OS=Mus musculus OX=10090 GN=Nt5c3a PE=1 SV=4	5.43807	37.228	85	105.55	0.805306	-0.312391	0.420532	down
Cd55	Complement decay-accelerating factor, GPI-anchored OS=Mus musculus OX=10090 GN=Cd55 PE=1 SV=2	4.35897	42.59	84.7	105.25	0.804751	-0.313386	0.418804	down
Aldh1a1	Retinal dehydrogenase 1 OS=Mus musculus OX=10090 GN=Aldh1a1 PE=1 SV=5	6.98603	54.433	83.9	104.6	0.802103	-0.318141	0.410606	down
Mup17	Major urinary protein 17 OS=Mus musculus OX=10090 GN=Mup17 PE=2 SV=2	78.8889	20.625	96.3	120.1	0.801832	-0.318628	0.409769	down
Fabp4	Fatty acid-binding protein, adipocyte OS=Mus musculus OX=10090 GN=Fabp4 PE=1 SV=3	44.697	14.641	82.5	102.9	0.801749	-0.318777	0.409515	down
Sh3bgrl	SH3 domain-binding glutamic acid-rich-like protein OS=Mus musculus OX=10090 GN=Sh3bgrl PE=1 SV=1	19.2982	12.803	83.6	104.4	0.800766	-0.320547	0.406492	down
Cd5l	CD5 antigen-like OS=Mus musculus OX=10090 GN=Cd5l PE=1 SV=3	24.7159	38.837	86.7	108.4	0.799815	-0.322262	0.403577	down
Galnt2	Polypeptide N-acetylgalactosaminyltransferase 2 OS=Mus musculus OX=10090 GN=Galnt2 PE=1 SV=1	2.63158	64.473	87.4	109.4	0.798903	-0.323908	0.400789	down
Prodh2	Hydroxyproline dehydrogenase OS=Mus musculus OX=10090 GN=Prodh2 PE=1 SV=1	3.72807	50.691	83	103.9	0.798845	-0.324012	0.400612	down
Xpnpep1	Xaa-Pro aminopeptidase 1 OS=Mus musculus OX=10090 GN=Xpnpep1 PE=1 SV=1	4.01284	69.547	88.6	110.95	0.798558	-0.324531	0.399736	down
Pfn1	Profilin-1 OS=Mus musculus OX=10090 GN=Pfn1 PE=1 SV=2	77.1429	14.948	85.3	107.45	0.793858	-0.333047	0.385522	down
Fyb1	FYN-binding protein 1 OS=Mus musculus OX=10090 GN=Fyb1 PE=1 SV=2	2.1978	90.001	85.6	107.85	0.793695	-0.333343	0.385034	down
Kctd12	BTB/POZ domain-containing protein KCTD12 OS=Mus musculus OX=10090 GN=Kctd12 PE=1 SV=1	2.14067	35.87	83.7	105.65	0.792239	-0.335992	0.380679	down
Sord	Sorbitol dehydrogenase OS=Mus musculus OX=10090 GN=Sord PE=1 SV=3	18.7675	38.225	88.6	111.95	0.791425	-0.337475	0.378256	down
Tsku	Tsukushin OS=Mus musculus OX=10090 GN=Tsku PE=2 SV=2	4.23729	38.338	82.7	104.6	0.790631	-0.338924	0.375898	down
Cela1	Chymotrypsin-like elastase family member 1 OS=Mus musculus OX=10090 GN=Cela1 PE=1 SV=1	3.00752	28.882	85.2	107.8	0.790353	-0.339431	0.375073	down
Hsp90ab1	Heat shock protein HSP 90-beta OS=Mus musculus OX=10090 GN=Hsp90ab1 PE=1 SV=3	11.0497	83.229	84.2	106.7	0.789128	-0.341669	0.371455	down
Pls1	Plastin-1 OS=Mus musculus OX=10090 GN=Pls1 PE=1 SV=1	7.30159	70.363	84.1	106.85	0.787085	-0.345409	0.36545	down
Tpt1	Translationally-controlled tumor protein OS=Mus musculus OX=10090 GN=Tpt1 PE=1 SV=1	15.6977	19.45	85.5	108.85	0.785485	-0.348344	0.36078	down
Ptpn6	Tyrosine-protein phosphatase non-receptor type 6 OS=Mus musculus OX=10090 GN=Ptpn6 PE=1 SV=2	2.01681	67.517	86.5	110.25	0.784581	-0.350006	0.358154	down
F13a1	Coagulation factor XIII A chain OS=Mus musculus OX=10090 GN=F13a1 PE=1 SV=3	26.3661	83.155	76.4	97.6	0.782787	-0.353308	0.352971	down
Arf5	ADP-ribosylation factor 5 OS=Mus musculus OX=10090 GN=Arf5 PE=1 SV=2	15.5556	20.517	86.4	110.6	0.781193	-0.356249	0.348397	down
Reg3b	Regenerating islet-derived protein 3-beta OS=Mus musculus OX=10090 GN=Reg3b PE=1 SV=1	13.1429	19.463	71.4	91.4	0.781182	-0.356269	0.348363	down
Timp3	Metalloproteinase inhibitor 3 OS=Mus musculus OX=10090 GN=Timp3 PE=1 SV=1	31.2796	24.166	84.4	108.1	0.780759	-0.357051	0.347153	down
Cd163	Scavenger receptor cysteine-rich type 1 protein M130 OS=Mus musculus OX=10090 GN=Cd163 PE=1 SV=2	2.05174	120.842	83.5	106.95	0.780739	-0.357088	0.347096	down
Eif5a	Eukaryotic translation initiation factor 5A-1 OS=Mus musculus OX=10090 GN=Eif5a PE=1 SV=2	33.1169	16.821	85.4	109.45	0.780265	-0.357964	0.345744	down
Mob1b	MOB kinase activator 1B OS=Mus musculus OX=10090 GN=Mob1b PE=1 SV=3	5.09259	25.075	81.8	104.85	0.780162	-0.358154	0.345451	down
Otub1	Ubiquitin thioesterase OTUB1 OS=Mus musculus OX=10090 GN=Otub1 PE=1 SV=2	5.53506	31.25	83.2	107	0.77757	-0.362956	0.338102	down
Park7	Protein/nucleic acid deglycase DJ-1 OS=Mus musculus OX=10090 GN=Park7 PE=1 SV=1	7.93651	20.008	84.4	108.85	0.775379	-0.367026	0.331949	down
Pkd2	Polycystin-2 OS=Mus musculus OX=10090 GN=Pkd2 PE=1 SV=2	0.724638	108.914	90.9	117.6	0.772959	-0.371536	0.32522	down
Mtpn	Myotrophin OS=Mus musculus OX=10090 GN=Mtpn PE=1 SV=2	30.5085	12.853	84.5	109.4	0.772395	-0.372589	0.32366	down
Spp1	Osteopontin OS=Mus musculus OX=10090 GN=Spp1 PE=1 SV=1	3.40136	32.44	85.8	111.2	0.771583	-0.374107	0.321422	down
Skap2	Src kinase-associated phosphoprotein 2 OS=Mus musculus OX=10090 GN=Skap2 PE=1 SV=2	14.8045	40.687	83.8	108.75	0.770575	-0.375993	0.318655	down
Arhgdia	Rho GDP-dissociation inhibitor 1 OS=Mus musculus OX=10090 GN=Arhgdia PE=1 SV=3	22.549	23.393	83.4	108.3	0.770083	-0.376914	0.317311	down
Itgb3	Integrin beta-3 OS=Mus musculus OX=10090 GN=Itgb3 PE=1 SV=2	1.14358	86.681	82.7	107.4	0.770019	-0.377034	0.317134	down
Taldo1	Transaldolase OS=Mus musculus OX=10090 GN=Taldo1 PE=1 SV=2	11.276	37.363	81.6	106	0.769811	-0.377424	0.316568	down
Twf2	Twinfilin-2 OS=Mus musculus OX=10090 GN=Twf2 PE=1 SV=1	6.87679	39.446	83.5	108.5	0.769585	-0.377847	0.315951	down
Rab5c	Ras-related protein Rab-5C OS=Mus musculus OX=10090 GN=Rab5c PE=1 SV=2	5.09259	23.398	85.3	110.95	0.768815	-0.379292	0.313854	down
Man2a2	Alpha-mannosidase 2x OS=Mus musculus OX=10090 GN=Man2a2 PE=1 SV=2	1.64931	130.566	80	104.25	0.767386	-0.381976	0.309983	down
Ywhab	14-3-3 protein beta/alpha OS=Mus musculus OX=10090 GN=Ywhab PE=1 SV=3	35.3659	28.069	85.9	112	0.766964	-0.382769	0.308845	down
Ube2n	Ubiquitin-conjugating enzyme E2 N OS=Mus musculus OX=10090 GN=Ube2n PE=1 SV=1	16.4474	17.127	84	109.6	0.766423	-0.383787	0.307388	down
Pkm	Pyruvate kinase PKM OS=Mus musculus OX=10090 GN=Pkm PE=1 SV=4	63.4652	57.808	81.9	107	0.765421	-0.385675	0.304698	down
Capza1	F-actin-capping protein subunit alpha-1 OS=Mus musculus OX=10090 GN=Capza1 PE=1 SV=4	2.7972	32.919	80.3	105.4	0.76186	-0.392402	0.295242	down
Rab11b	Ras-related protein Rab-11B OS=Mus musculus OX=10090 GN=Rab11b PE=1 SV=3	28.4404	24.474	81.5	107.35	0.759199	-0.39745	0.288278	down
Ran	GTP-binding nuclear protein Ran OS=Mus musculus OX=10090 GN=Ran PE=1 SV=3	20.8333	24.408	82.9	109.75	0.755353	-0.404777	0.278368	down
Ctla2a	Protein CTLA-2-alpha OS=Mus musculus OX=10090 GN=Ctla2a PE=2 SV=2	43.7956	15.873	84.1	112.55	0.747223	-0.420389	0.258033	down
Wdr1	WD repeat-containing protein 1 OS=Mus musculus OX=10090 GN=Wdr1 PE=1 SV=3	20.462	66.365	81.8	110	0.743636	-0.427331	0.249329	down
Dsc3	Desmocollin-3 OS=Mus musculus OX=10090 GN=Dsc3 PE=1 SV=3	1.00446	100.14	88.6	119.25	0.742977	-0.428611	0.247747	down
Prdx5	Peroxiredoxin-5, mitochondrial OS=Mus musculus OX=10090 GN=Prdx5 PE=1 SV=2	20.9524	21.884	80.4	108.4	0.741697	-0.431098	0.244694	down
H2-Q9	H-2 class I histocompatibility antigen, Q9 alpha chain (Fragment) OS=Mus musculus OX=10090 GN=H2-Q9 PE=3 SV=1	19.5	23.01	78.8	106.5	0.739906	-0.434586	0.240455	down
Aco1	Cytoplasmic aconitate hydratase OS=Mus musculus OX=10090 GN=Aco1 PE=1 SV=3	1.5748	98.063	81.5	110.2	0.739564	-0.435253	0.239651	down
Cela2a	Chymotrypsin-like elastase family member 2A OS=Mus musculus OX=10090 GN=Cela2a PE=1 SV=1	3.32103	28.895	83.7	113.25	0.739073	-0.436211	0.238497	down
Hp	Haptoglobin OS=Mus musculus OX=10090 GN=Hp PE=1 SV=1	68.2997	38.727	92.8	125.8	0.737679	-0.438935	0.235242	down
Pde5a	cGMP-specific 3',5'-cyclic phosphodiesterase OS=Mus musculus OX=10090 GN=Pde5a PE=1 SV=2	6.7052	98.344	82.9	112.6	0.736234	-0.441764	0.231897	down
Inf2	Inverted formin-2 OS=Mus musculus OX=10090 GN=Inf2 PE=1 SV=1	0.549882	138.474	77.9	105.85	0.735947	-0.442326	0.231235	down
Gdi2	Rab GDP dissociation inhibitor beta OS=Mus musculus OX=10090 GN=Gdi2 PE=1 SV=1	6.96629	50.505	80.8	109.95	0.734879	-0.444421	0.228784	down
Rsu1	Ras suppressor protein 1 OS=Mus musculus OX=10090 GN=Rsu1 PE=1 SV=3	29.6029	31.531	82.4	112.25	0.734076	-0.445999	0.226949	down
Arpc4	Actin-related protein 2/3 complex subunit 4 OS=Mus musculus OX=10090 GN=Arpc4 PE=1 SV=3	11.3095	19.654	80.5	110	0.731818	-0.450443	0.221839	down
Nid1	Nidogen-1 OS=Mus musculus OX=10090 GN=Nid1 PE=1 SV=2	0.803213	136.45	79.4	108.8	0.729779	-0.454468	0.217283	down
Fah	Fumarylacetoacetase OS=Mus musculus OX=10090 GN=Fah PE=1 SV=2	2.38663	46.146	75.5	103.6	0.728764	-0.456476	0.215036	down
Clec4f	C-type lectin domain family 4 member F OS=Mus musculus OX=10090 GN=Clec4f PE=1 SV=1	16.7883	61.231	82.5	113.45	0.727193	-0.45959	0.211582	down
Gdi1	Rab GDP dissociation inhibitor alpha OS=Mus musculus OX=10090 GN=Gdi1 PE=1 SV=3	8.2774	50.489	79.3	109.05	0.727189	-0.459598	0.211575	down
Arpc2	Actin-related protein 2/3 complex subunit 2 OS=Mus musculus OX=10090 GN=Arpc2 PE=1 SV=3	11.6667	34.336	79	108.85	0.725769	-0.462418	0.208483	down
Rab14	Ras-related protein Rab-14 OS=Mus musculus OX=10090 GN=Rab14 PE=1 SV=3	8.83721	23.882	78.6	108.45	0.724758	-0.464429	0.206297	down
Ubash3b	Ubiquitin-associated and SH3 domain-containing protein B OS=Mus musculus OX=10090 GN=Ubash3b PE=1 SV=1	1.5674	71.398	79.3	109.65	0.72321	-0.467513	0.202979	down
Rps27a	Ubiquitin-40S ribosomal protein S27a OS=Mus musculus OX=10090 GN=Rps27a PE=1 SV=2	27.5641	17.939	81.7	113.15	0.72205	-0.469829	0.200514	down
Lasp1	LIM and SH3 domain protein 1 OS=Mus musculus OX=10090 GN=Lasp1 PE=1 SV=1	2.6616	29.975	82.3	114.3	0.720035	-0.473861	0.196272	down
Parvb	Beta-parvin OS=Mus musculus OX=10090 GN=Parvb PE=1 SV=1	3.83562	41.643	81	112.6	0.719361	-0.475212	0.194865	down
Pdlim1	PDZ and LIM domain protein 1 OS=Mus musculus OX=10090 GN=Pdlim1 PE=1 SV=4	7.03364	35.752	80.9	112.75	0.717517	-0.478915	0.191049	down
Ube2v1	Ubiquitin-conjugating enzyme E2 variant 1 OS=Mus musculus OX=10090 GN=Ube2v1 PE=1 SV=1	4.7619	16.344	79.3	110.8	0.715704	-0.482565	0.187342	down
St13	Hsc70-interacting protein OS=Mus musculus OX=10090 GN=St13 PE=1 SV=1	4.58221	41.629	79.2	110.85	0.714479	-0.485036	0.184862	down
Ldha	L-lactate dehydrogenase A chain OS=Mus musculus OX=10090 GN=Ldha PE=1 SV=3	37.6506	36.475	79.1	111.5	0.709417	-0.495294	0.174827	down
Actbl2	Beta-actin-like protein 2 OS=Mus musculus OX=10090 GN=Actbl2 PE=1 SV=1	23.9362	41.977	69.9	113.9	0.613696	-0.704404	0.046899	down
Ppia	Peptidyl-prolyl cis-trans isomerase A OS=Mus musculus OX=10090 GN=Ppia PE=1 SV=2	46.9512	17.96	71.6	117.45	0.609621	-0.714015	0.0437805	down
Dstn	Destrin OS=Mus musculus OX=10090 GN=Dstn PE=1 SV=3	34.5455	18.509	69.4	114.1	0.608238	-0.717292	0.0427585	down
Actc1	Actin, alpha cardiac muscle 1 OS=Mus musculus OX=10090 GN=Actc1 PE=1 SV=1	38.4615	41.992	69.1	113.9	0.606673	-0.721009	0.0416228	down
Mapre1	Microtubule-associated protein RP/EB family member 1 OS=Mus musculus OX=10090 GN=Mapre1 PE=1 SV=3	9.32836	29.997	68.4	112.9	0.605846	-0.722977	0.0410324	down
Ehd4	EH domain-containing protein 4 OS=Mus musculus OX=10090 GN=Ehd4 PE=1 SV=1	3.8817	61.441	70	116	0.603448	-0.728699	0.0393558	down
Cnn2	Calponin-2 OS=Mus musculus OX=10090 GN=Cnn2 PE=1 SV=1	7.21311	33.134	69.4	115.05	0.603216	-0.729253	0.0391962	down
Calr	Calreticulin OS=Mus musculus OX=10090 GN=Calr PE=1 SV=1	24.5192	47.965	71.5	118.55	0.603121	-0.729481	0.0391311	down
H2-K1	H-2 class I histocompatibility antigen, K-D alpha chain OS=Mus musculus OX=10090 GN=H2-K1 PE=1 SV=1	5.43478	41.464	65.2	109.4	0.595978	-0.746669	0.0344624	down
Ywhae	14-3-3 protein epsilon OS=Mus musculus OX=10090 GN=Ywhae PE=1 SV=1	36.8627	29.155	69.1	116.3	0.594153	-0.751094	0.0333406	down
Eno1	Alpha-enolase OS=Mus musculus OX=10090 GN=Eno1 PE=1 SV=3	34.3318	47.111	70.3	118.4	0.59375	-0.752072	0.0330966	down
Sh3bgrl3	SH3 domain-binding glutamic acid-rich-like protein 3 OS=Mus musculus OX=10090 GN=Sh3bgrl3 PE=1 SV=1	38.7097	10.47	69.6	117.8	0.590832	-0.75918	0.0313709	down
Cotl1	Coactosin-like protein OS=Mus musculus OX=10090 GN=Cotl1 PE=1 SV=3	10.5634	15.934	68.6	116.3	0.589854	-0.76157	0.0308082	down
Cdc42	Cell division control protein 42 homolog OS=Mus musculus OX=10090 GN=Cdc42 PE=1 SV=2	14.6597	21.245	68.3	116	0.588793	-0.764168	0.0302067	down
Ilk	Integrin-linked protein kinase OS=Mus musculus OX=10090 GN=Ilk PE=1 SV=2	10.6195	51.34	67.5	115.05	0.586701	-0.769303	0.0290472	down
Coro1a	Coronin-1A OS=Mus musculus OX=10090 GN=Coro1a PE=1 SV=5	21.692	50.957	69.2	118.25	0.585201	-0.772996	0.0282366	down
Cfl1	Cofilin-1 OS=Mus musculus OX=10090 GN=Cfl1 PE=1 SV=3	74.6988	18.548	69.2	118.3	0.584953	-0.773607	0.0281047	down
Prkca	Protein kinase C alpha type OS=Mus musculus OX=10090 GN=Prkca PE=1 SV=3	1.04167	76.802	70	120.35	0.581637	-0.781809	0.0263814	down
Flna	Filamin-A OS=Mus musculus OX=10090 GN=Flna PE=1 SV=5	29.5807	281.046	68.2	118	0.577966	-0.790943	0.0245708	down
Src	Neuronal proto-oncogene tyrosine-protein kinase Src OS=Mus musculus OX=10090 GN=Src PE=1 SV=4	1.47874	60.606	64.6	113.1	0.571176	-0.807993	0.0214777	down
Dnajb4	DnaJ homolog subfamily B member 4 OS=Mus musculus OX=10090 GN=Dnajb4 PE=1 SV=1	7.71513	37.758	68.3	119.85	0.569879	-0.811272	0.0209233	down
Capzb	F-actin-capping protein subunit beta OS=Mus musculus OX=10090 GN=Capzb PE=1 SV=3	3.61011	31.326	66.9	117.95	0.56719	-0.818096	0.0198093	down
Ptpn11	Tyrosine-protein phosphatase non-receptor type 11 OS=Mus musculus OX=10090 GN=Ptpn11 PE=1 SV=2	3.18258	68.417	66	116.6	0.566038	-0.821029	0.0193468	down
Arhgdib	Rho GDP-dissociation inhibitor 2 OS=Mus musculus OX=10090 GN=Arhgdib PE=1 SV=3	50	22.836	67.2	119.45	0.562578	-0.829875	0.0180087	down
Tln1	Talin-1 OS=Mus musculus OX=10090 GN=Tln1 PE=1 SV=2	38.6856	269.653	66.1	117.75	0.561359	-0.833004	0.0175547	down
Rap1b	Ras-related protein Rap-1b OS=Mus musculus OX=10090 GN=Rap1b PE=1 SV=2	35.8696	20.812	66.2	118.95	0.556536	-0.845453	0.0158479	down
Esd	S-formylglutathione hydrolase OS=Mus musculus OX=10090 GN=Esd PE=1 SV=1	14.1844	31.299	66.5	120.15	0.553475	-0.85341	0.0148347	down
Myl6	Myosin light polypeptide 6 OS=Mus musculus OX=10090 GN=Myl6 PE=1 SV=3	21.1921	16.919	67.4	121.85	0.553139	-0.854286	0.0147268	down
Ahsp	Alpha-hemoglobin-stabilizing protein OS=Mus musculus OX=10090 GN=Ahsp PE=1 SV=1	18.6275	11.825	69	124.85	0.552663	-0.855528	0.0145749	down
Hpse	Heparanase OS=Mus musculus OX=10090 GN=Hpse PE=1 SV=3	3.36449	60.028	67.2	124	0.541936	-0.883806	0.0114708	down
Tagln2	Transgelin-2 OS=Mus musculus OX=10090 GN=Tagln2 PE=1 SV=4	63.3166	22.381	62.8	116.95	0.536982	-0.897054	0.01023	down
Bin2	Bridging integrator 2 OS=Mus musculus OX=10090 GN=Bin2 PE=1 SV=1	23.5174	52.522	65.7	122.5	0.536327	-0.898815	0.0100744	down
Eef1a1	Elongation factor 1-alpha 1 OS=Mus musculus OX=10090 GN=Eef1a1 PE=1 SV=3	13.6364	50.082	64.4	122.95	0.52379	-0.93294	0.00744782	down
Prdx6	Peroxiredoxin-6 OS=Mus musculus OX=10090 GN=Prdx6 PE=1 SV=3	10.2679	24.855	59.6	118.55	0.502741	-0.992113	0.00431043	down
Tbcb	Tubulin-folding cofactor B OS=Mus musculus OX=10090 GN=Tbcb PE=1 SV=2	4.09836	27.368	59.6	119	0.50084	-0.997578	0.00409202	down
Ywhaz	14-3-3 protein zeta/delta OS=Mus musculus OX=10090 GN=Ywhaz PE=1 SV=1	60.4082	27.754	61.2	123.75	0.494545	-1.01583	0.00343366	down
Tpm4	Tropomyosin alpha-4 chain OS=Mus musculus OX=10090 GN=Tpm4 PE=1 SV=3	59.2742	28.45	60.7	124.3	0.488335	-1.03406	0.00287357	down
Mri1	Methylthioribose-1-phosphate isomerase OS=Mus musculus OX=10090 GN=Mri1 PE=1 SV=1	2.43902	39.386	61.6	127.45	0.483327	-1.04893	0.00247994	down
Abracl	Costars family protein ABRACL OS=Mus musculus OX=10090 GN=Abracl PE=1 SV=1	27.1605	9.025	56.2	117.25	0.479318	-1.06094	0.00219862	down
Plek	Pleckstrin OS=Mus musculus OX=10090 GN=Plek PE=1 SV=1	22.8571	39.876	58.2	122.25	0.476074	-1.07074	0.00199123	down
Rrbp1	Ribosome-binding protein 1 OS=Mus musculus OX=10090 GN=Rrbp1 PE=1 SV=2	9.96885	172.776	60.6	129.75	0.467052	-1.09834	0.0014997	down
Tmsb10	Thymosin beta-10 OS=Mus musculus OX=10090 GN=Tmsb10 PE=1 SV=3	47.7273	5.023	58.8	135.5	0.433948	-1.20441	0.000475027	down
Ywhaq	14-3-3 protein theta OS=Mus musculus OX=10090 GN=Ywhaq PE=1 SV=1	31.0204	27.761	51.2	124	0.412903	-1.27613	0.000206724	down
Ywhah	14-3-3 protein eta OS=Mus musculus OX=10090 GN=Ywhah PE=1 SV=2	50.4065	28.194	52.6	128.8	0.408385	-1.292	0.000170932	down
Rac1	Ras-related C3 botulinum toxin substrate 1 OS=Mus musculus OX=10090 GN=Rac1 PE=1 SV=1	9.89583	21.436	49.8	127.7	0.389977	-1.35854	7.52335e-05	down
Rgs10	Regulator of G-protein signaling 10 OS=Mus musculus OX=10090 GN=Rgs10 PE=1 SV=1	6.62983	21.138	51.9	135.9	0.381898	-1.38874	5.11894e-05	down
Ehd3	EH domain-containing protein 3 OS=Mus musculus OX=10090 GN=Ehd3 PE=1 SV=2	2.80374	60.783	44.6	129.6	0.344136	-1.53895	6.70204e-06	down
Ywhag	14-3-3 protein gamma OS=Mus musculus OX=10090 GN=Ywhag PE=1 SV=2	24.2915	28.285	44.6	131.15	0.340069	-1.5561	5.24747e-06	down
